## 1 **Retrospective analysis of enhancer activity and transcriptome history**

2 Ruben Boers<sup>1\*</sup>, Joachim Boers<sup>1\*</sup>, Beatrice Tan<sup>1\*</sup>, Evelyne Wassenaar<sup>1</sup>, Erlantz Gonzalez Sanchez<sup>1</sup>, Esther  
3 Sleddens<sup>1</sup>, Yasha Tenhagen<sup>1</sup>, Marieke E. van Leeuwen<sup>1</sup>, Eskeatnaf Mulugeta<sup>2</sup>, Joop Laven<sup>3</sup>, Menno  
4 Creyghton<sup>1</sup>, Willy Baarends<sup>1</sup>, Wilfred F. J. van IJcken<sup>4</sup> and Joost Gribnau<sup>1</sup>

5 1) department of Developmental Biology, Erasmus University Medical Center Rotterdam,  
6 Oncode Institute,

7 2) department of Cell Biology, Erasmus University Medical Center Rotterdam

8 3) department of Gynaecology, Erasmus University Medical Center Rotterdam

9 4) Erasmus Center for Biomics, Erasmus University Medical Center Rotterdam

10 \*) these authors contributed equally to this manuscript

11

## 12 **Abstract**

13 Cell state changes in development and disease are controlled by gene regulatory networks, the  
14 dynamics of which are difficult to track in real time. Here, we utilize an inducible DCM-RNA-  
15 polymerase-subunit-b fusion protein, to label active genes and enhancers with a bacterial methylation  
16 mark that does not affect gene transcription and is propagated in S-phase. We applied this DCM-time-  
17 machine (DCM-TM) technology to study intestinal homeostasis, following enterocyte differentiation  
18 back in time, revealing rapid and simultaneous activation of enhancers and nearby genes during  
19 intestinal stem cell (ISC) differentiation. We provide new insights in the absorptive-secretory lineage  
20 decision in ISC differentiation, and show that ISCs retain a unique chromatin landscape required to  
21 maintain ISC identity and delineate future expression of differentiation associated genes. DCM-TM has  
22 wide applicability in tracking cell states, providing new insights in the regulatory networks underlying  
23 cell state changes in development and differentiation.

24

## 25 **Introduction**

26 Embryonic development and cell differentiation are intricate processes directed by cross talk between  
27 cells that affect cell fate decisions and the establishment of cell type specific gene expression programs  
28 (Bradner et al., 2017; Lee and Young, 2013; Stadhouders et al., 2019). Lineage tracing studies have  
29 been crucial to understand these processes. Initial studies applied light microscopy to follow cleavage  
30 divisions, but since then bar-coding, cre-lox and other genetic systems have been utilized to mark  
31 precursors or progenitors for readout at later stages of development or differentiation (Alemany et al.,  
32 2018). The present advance of the single cell RNA sequencing (scRNA-seq) technology provides a  
33 wealth of expression data that can be used to predict developmental trajectories *in silico* and can be  
34 linked to genetic lineage tracing techniques to rebuild lineage trees (Bowling et al., 2020; Herman et  
35 al., 2018; Schiebinger et al., 2019).

36 Application of these tracing technologies to study the epithelium of the small intestine provided critical  
37 insights in homeostasis and regeneration. Turnover of this epithelium happens within 7 days and starts  
38 with division of the intestinal stem cell (ISC) located at the bottom of the intestinal crypt (Beumer and  
39 Clevers, 2020). ISCs give rise to progenitors that divide moving up the intestinal crypt meanwhile  
40 committing to absorptive or secretory lineage. Absorptive progenitors mature into enterocytes,  
41 whereas secretory progenitors give rise to Paneth, tuft, entero-endocrine and goblet cells. ISCs are  
42 flanked by Paneth cells that provide Wnt, Notch and EGF signals required for self-renewal. Loss of ISC-  
43 Paneth cell contact facilitates cell differentiation, aided by BMP signalling that further supports  
44 maturation of differentiated cell types. Notch signalling also plays a crucial role in lineage commitment  
45 remaining high in absorptive progenitors and is downregulated in secretory progenitors. Lineage  
46 tracing and scRNA-seq experiments have been instrumental in identification and characterisation of  
47 the crypt based columnar cell as the ISC (Barker et al., 2007), but also showed that several other cell  
48 types including entero-endocrine, Paneth and immature enterocytes provide a reservoir of cells that

49 can replenish the ISC niche in injury induced regeneration (Tetteh et al., 2016; Yan et al., 2017; Yu et  
50 al., 2018).

51 While these examples highlight the successful application of lineage tracing and scRNA-seq  
52 technologies to build relationships between cellular trajectories they cannot keep track of cell state  
53 changes following this trajectory and provide limited depth and temporal information with respect to  
54 gene expression changes (Baron and van Oudenaarden, 2019). To facilitate whole genome cell state  
55 tracing, we developed a system to epigenetically tag transcribed genes to be examined at later stages  
56 of development or differentiation. We made use of a fusion between DCM and RNA-polymerase-2-  
57 subunit-b to epigenetically label gene bodies of transcribed genes. DCM methylation of C<sub>me</sub>C(A/T)GG  
58 penta-nucleotides is a bacterial form of cytosine methylation only detected at very low levels in most  
59 mammalian cell types, but is maintained when introduced on transgenes in somatic cells without  
60 affecting transgene expression (Clark et al., 1995). Our study demonstrates that DCM-TM marks both  
61 active genes as well as enhancers, both of which are occupied by RNA-polymerase-2 and confirms that  
62 DCM methylation is propagated to daughter cells with limited effect on gene expression. Thus DCM-  
63 TM provides a powerful technology to trace genome wide gene transcription and enhancer activity  
64 back in time without relying on in silico assumptions. We applied DCM-TM to study homeostasis in the  
65 small intestine, generating gene and enhancer activity maps that trace the ISC state to the enterocyte  
66 state. We discovered that gene and enhancer activity changes during enterocyte differentiation are  
67 not mediated by heterochromatin changes and show that the H2A variant H2A.Z is preloaded at ISC  
68 enhancers that will become activated in the enterocyte. Application of DCM-TM also indicated that  
69 commitment of progenitors to the absorptive lineage is a one-way event which does not involve a  
70 temporarily dynamic absorptive-secretory intermediate state.

71

72

## 73 **Results**

### 74 ***DCM-Polr2b marks active genes and enhancers.***

75 To develop a gene activity tagging system we fused DCM to the N-terminal end of mouse RNA-  
76 polymerase-2 subunit-b (*Polr2b*, Fig 1a), and introduced this DCM-Polr2b fusion gene into the *Col1a1*  
77 locus, in an ESC line harbouring the m2rtTA trans-activator expressed from the *Rosa26* locus (Sup Fig  
78 1a-b)(Beard et al., 2006). Addition of doxycycline leads to expression of the fusion protein at levels  
79 comparable to endogenous POLR2B, and expression is depleted 24 hours after removal of doxycycline  
80 (Sup Fig 1c-d). To detect DCM methylation we developed methylated DNA sequencing (MeD-seq), a  
81 technology based on LpnPI mediated digestion of CpG and DCM methylated target sites resulting in 32  
82 base pair fragments that are sequenced (Fig 1a)(Boers et al., 2018). LpnPI recognizes 50% of all  
83 methylated CpG di-nucleotides ( $C_{me}CG$ ,  $meCGG$ , and  $G_{me}CGC$ ), as well as DCM methylated  $C_{me}C(A/T)GG$   
84 penta-nucleotides.

85 Addition of doxycyclin (dox) to DCM-Polr2b:m2rtTA ESCs for five days resulted in a 5-fold induction of  
86 DCM methylation genome wide (Fig 1b, Sup Fig 1e, Sup Table 1). DCM methylation clearly increased in  
87 gene bodies of genes expressed in ESCs (*Nanog*, *Zfp42*, *ActB*), while no accumulation was observed in  
88 genes not expressed in ESCs (*Lgr5*, *Alpi*, Fig 1c-d, Sup Fig 1f). The distribution of DCM sites is clearly  
89 different from CpG sites, showing no clear enrichment at the TSS (Sup Fig 1f). In genes with at least 10  
90 DCM sites, uninduced gene body DCM methylation displayed little correlation with gene expression,  
91 while after dox induction this correlation became robust (Fig 1e, Sup Fig 1g). Gene-meta-analysis  
92 indicated that the DCM methylation profile before dox induction resembled the distribution of CpG  
93 methylation that was present in gene bodies of active genes and possibly introduced as an accidental  
94 by-product of CpG methylation (Fig 1f, Sup Fig 1k-m) (Arand et al., 2012). After induction, the DCM  
95 methylation profile displayed increased DCM methylation at the transcription start sites (TSS), gene  
96 body and transcription end sites (TES), with a direct relationship between gene expression and DCM  
97 methylation levels (Fig 1f-g).

98 Comparison with published ChIP-seq data confirmed accumulation of DCM methylation at the TSS and  
99 gene body (H3K36me3) after dox induction. In addition, we found DCM methylation to accumulate at  
100 regions marked by enhancer specific modifications or protein recruitment (P300, H3K27Ac and  
101 H3K4me1, Fig 1c-d, h, and Sup Fig 2a-b) which is consistent with Pol2 recruitment occurring at  
102 enhancers (Kim et al., 2010). Whole genome differentially methylated region (DMR) calling (+dox vs –  
103 dox, Mann-Whitney significance test) identified 5,973 regions, displaying significantly increased DCM  
104 methylation levels, enriched for enhancer specific histone modifications, DNase sensitivity, and  
105 pluripotency factor binding (Sup Fig 2c). DCM methylation levels were significantly elevated in genes  
106 located in closest proximity to these intergenic DCM DMRs, and enhancer density was proportional to  
107 activity of the closest gene (Sup Fig 2d-e)(Kim et al., 2010). Only 6 genes responded, with a change in  
108 gene expression, following induction of the DCM-Polr2b fusion gene (Fig 1i), confirming an earlier  
109 report that DCM directed methylation of gene bodies has little effect on gene expression (Clark et al.,  
110 1995). These results indicate that DCM-Polr2b is functional and labels active genes and enhancers with  
111 minimal effect on gene expression.

112

### 113 ***DCM methylation propagation in vivo.***

114 To monitor accumulation, maintenance and propagation of DCM methylation *in vivo* we generated  
115 DCM-Polr2b transgenic mice. Total epithelium of jejunum was isolated through mechanical shearing  
116 from transgenic mice treated with doxycyclin from day 0 through day 18. MeD-seq analysis indicated  
117 induced DCM methylation to plateau around day 6 with a >25-fold induction over endogenous DCM  
118 methylation levels (Fig 2a-b, Sup Table 1, Sup Fig 3a). Similar as observed in ESCs DCM methylation of  
119 TSS, gene body and TES, correlated with gene expression level, Polr2a binding, H3K36me3 deposition  
120 (transcribed genes), and H3K27Ac enriched regions (active promoters and enhancers, Fig 2b-e). In  
121 addition, DCM gene density distribution was clearly distinct from CpG methylation (Sup Fig 3b). To  
122 determine the *in vivo* DCM methylation propagation rate in jejunum, mice were administered dox for

123 7 days, followed by a chase period of 0-7 days after which DCM/CpG methylation ratios were  
124 established in triplicate by MeD-seq. With an estimated average cell cycle of 18.3 hours, and taking  
125 into account that MeD-seq analysis does not detect hemi-methylated templates, DCM propagation  
126 was estimated to be 0.78 per cell division (Fig 2f)(Parker et al., 2017). We found no difference in the  
127 propagation rate for specific genomic regions such as gene bodies, exons, introns, CpG islands, or  
128 intergenic regions (Sup Fig 3c). Longer chase periods for up to two months after induction, still revealed  
129 DCM methylation gene density profiles that were clearly distinct from controls (Sup Fig 3d) suggesting  
130 our method is compatible with cell state tracing across longer temporal windows.

131

### 132 ***Gene activity dynamics in ISC to enterocyte differentiation.***

133 As turnover of the epithelium is very high in the intestine, we tested our DCM-TM technology following  
134 the differentiation of ICSs into enterocytes that are eventually shed from the top of the villi. We  
135 isolated enterocytes, through sequential purification of small intestinal epithelium, followed by FACS  
136 sorting of Epcam+/SLC2A2+(GLUT2) enterocytes (Fig 3a, Sup Fig 4a). Comparison of RNA-seq data of  
137 isolated cells with published scRNA-seq data obtained from intestinal epithelium confirmed proper  
138 isolation of proximal enterocytes (Sup Fig 4a-c)(Haber et al., 2017). Subsequently, the DCM-Polr2b  
139 fusion gene was induced with doxycycline and enterocytes were isolated at different time points across  
140 an eight-day window, followed by MeD-seq and normalization for DCM induction efficiency (Sup Fig  
141 4d, Sup Table 2). In this setting turn-over of the fusion protein is not required and non-dividing cells do  
142 not affect the assay. As time passes, DCM methylation levels of stem cell specific genes are expected  
143 to increase relative to the total pool of DCM sequencing reads as their profile will be propagated in the  
144 transit amplifying (TA) cells and enterocytes (Fig 3a). In contrast, DCM reads from enterocyte specific  
145 genes as well as ubiquitous expressed genes are expected to decline over time as they are shed from  
146 the top of the villi. Indeed, stem cell markers *Lgr5*, *Sorbs2*, *Smoc2*, and *Slc12a2*, Wnt target gene *Cd44*,  
147 and ephrin receptors *EphB2* and *EphB3* displayed an increase in DCM gene body labelling reaching a

148 maximum signal at day 6 (Fig 3b-c, Sup Fig 4e). Ephrin receptor ligands expressed in the villus, *Efnb1*  
149 and *Efnb2*, and enterocyte markers *Cbr1*, *Slc2a2*, *Apoa1*, *Alpi* and *Lct* displayed a decrease in DCM  
150 methylation (Fig 3b,d, Sup Fig 4e). Ubiquitously expressed genes resembled enterocyte specific genes  
151 but with slower kinetics and less dynamic behaviour (Sup Fig 4f). Finally, genes associated with other  
152 differentiated cell types or cell types implicated in injury-induced plasticity, including the Paneth,  
153 goblet, tuft, entero-endocrine and +4 cell, either did not increase over time, or remained below  
154 background levels, indicating no role for these cell types in intestinal homeostasis in the measured  
155 time span (Fig 3e-f). One clear exception was *Bmi1*, contrasting with other +4 cell markers in behaviour  
156 by resembling other ISC genes. This emphasizes a role for *Bmi1* in ISC homeostasis in line with studies  
157 indicating *Bmi1* to be essential for ISC maintenance and intestinal homeostasis (Lopez-Arribillaga et  
158 al., 2015).

159 To generate temporal gene activity maps throughout ISC to enterocyte differentiation, genes with a  
160 DCM signal significantly higher than background were clustered according to their temporal signal  
161 strength using maximum signal day, and average expression of the different gene clusters was  
162 displayed on a UMAP that was based on scRNA-seq data from intestinal epithelium (Fig 3g-h)(Haber et  
163 al., 2017). This analysis showed that genes with a temporal methylation profile peaking at day 1 (cluster  
164 1) are enriched in enterocytes, whereas genes that peak at day 6 (cluster 6) and more prominently at  
165 day 8 (cluster 8) are enriched in ISCs (Fig 3h), suggesting that our analysis traces all the way back  
166 through intestinal development. Moreover, DCM-TM detects significantly more genes than detected  
167 by scRNA-seq, which misses lowly expressed genes due to limited sensitivity (Islam et al., 2014). Using  
168 immuno-cytochemistry, we confirmed exclusive expression of cluster 1 specific proteins (SGLT1,  
169 SLC43A2) in the villus. Furthermore, cluster 6 and 8 proteins (GNL3 and NUP54) were expressed in the  
170 crypt and could be verified as novel gene markers for ISCs (Fig 3i-j, Sup Fig 4g). Genes with a maximum  
171 temporal signal at day 2 displayed the highest expression level and were expressed in most single cells  
172 across different cell types, indicating that this cluster mostly represents ubiquitously expressed genes

173 (Fig 3h, Sup Fig 4h). These results further confirm that the DCM signal is propagated in S-phase and  
174 that DCM-TM can be used to retrieve gene activity maps retrospectively.

175

### 176 ***Enhancer activity dynamics in ISC differentiation.***

177 We next explored whether enhancer activity could be tracked across ISC to enterocyte differentiation  
178 using CHIP- and ATAC-Seq data generated in epithelium isolated from the villus (Saxena et al., 2017).

179 We found a clear correlation between H3K27ac, which marks active promoters and enhancers (Calo  
180 and Wysocka, 2013), DNA accessibility and DCM methylation (Sup Fig 5a,d)(Saxena et al., 2017). 42%

181 of these H3K27ac peaks were enriched for DCM (with 80% of the high-DCM cluster labelled), whereas  
182 the majority of the remaining enhancer peaks lacked sufficient DCM sites for high confidence analysis

183 of their state (Fig 4a, Sup Fig 5b-d). Interestingly, DCM-TM detected a limited number of bivalent  
184 enhancers marked by both H3K27ac and H3K9me3 suggesting Rpol2B is in rare cases recruited to

185 poised enhancer states. Nevertheless, most intergenic DCM labelled DMRs are marked by active  
186 enhancer chromatin likely reflecting active intestinal enhancers (Sup Fig 5a). DCM methylation was

187 evident at known enhancers near enterocyte (*Fabp1*, *Cbr*), ubiquitous (*Actb*), and ISC (*Olfm4*, *Znhit3*)  
188 genes peaking at different time points after the start of doxycyclin treatment (Fig 4b, Sup Fig 6b, Sup

189 Table 3) (Kaaïj et al., 2013). We annotated 51,779 intergenic DCM DMRs (> 1kb from TSS) between -  
190 dox and +dox (all stages). Clustering of these intergenic DMRs based on their temporal peak values

191 highlighted the dynamic behaviour of enhancer activity during cell state specification (Fig 4c). As  
192 expected, enrichment of H3K27ac at DMRs, was more pronounced at early than later time points as

193 these DMRs reflect enterocyte specific and ubiquitous enhancers that are active in villi (Fig 4c).  
194 Interestingly, comparison of the different enhancer clusters based on peak day with ATAC-seq data

195 indicates that enterocyte enhancers are accessible, whereas enhancers active at earlier stages of  
196 differentiation lose accessibility in enterocytes. We did not observe this dynamic behaviour in

197 accessibility for TSSs, (Sup Fig 6b). Density analysis of enhancers of the different clusters around the



198 different gene clusters showed a coordination in peak days of enhancers and nearby genes in the  
199 enterocyte differentiation process (Fig 4e, Sup Fig 6c). Genes displaying a maximum at day 2 display  
200 different enhancer kinetics as this cluster consists of both ubiquitously expressed and stage specific  
201 genes (Sup Fig 6d). ChromVAR motif analysis on enhancer regions confirmed enrichment of motifs for  
202 ISC specific transcription factors (TFs) peaking at day 8 (TCF4 and TEAD1). Enterocyte differentiation  
203 associated TFs, including ELF3, KLF5 as well as HNFA/G, known to have a crucial role in enterocyte  
204 differentiation, peak at early time points (Fig 4f, Sup Fig 6e, Sup Table 4)(Chen et al., 2019; Ng et al.,  
205 2002). In addition, by selecting TFs displaying coordinated timing of gene body and enhancer DCM  
206 labelling (Pearson  $r > 0.3$ ) we were able to identify *Mef2b* and *Tgif1* as potentially novel candidate TFs  
207 in ISC homeostasis and enterocyte differentiation similar to their proposed roles in other systems (Fig  
208 4g)(Ito et al., 2017; Lee et al., 2015). In addition, reverse-coordinated peak timing (Pearson  $< -0.3$ ) with  
209 maximum DCM gene body labelling in ISCs and maximum motif labelling in enterocytes identified  
210 known and putative new repressors (*Atf7*, *Glis2*, and *Mixl1*) of the ISC state (Liu et al., 2019). These  
211 results show that DCM-TM can be utilized to detect enhancer activity and relate these to underlying  
212 transcription factor dynamics.

213

#### 214 ***ISC gene expression dynamics is independent of polycomb mediated repression.***

215 DCM-TM revealed *Bmi1*, a member of non-canonical polycomb complex PRC1.4, to be expressed in  
216 the ISC (Figure 3c and f). The family of PRC1 complexes is formed around a core of RING1A/B that  
217 interacts with PCGF partner proteins to form canonical PRC1 (PCGF2) and non-canonical PRC1  
218 complexes (PCGF1, PCGF3, BMI, PCGF5, PCGF6, Fig 5a) involved in the formation of facultative  
219 heterochromatin through deposition of H2A119ub (Aranda et al., 2015). In the intestine studies  
220 involving loss of PRC1 members *Bmi1* or *Ring1b* suggested that PRC1 is required for ISC maintenance  
221 by preventing the ectopic expression of non-lineage genes through active repression (Chiacchiera et  
222 al., 2016a; Lopez-Arribillaga et al., 2015). Indeed DCM-TM indicated several other members of PRC1

223 complexes including *Ring1b* and *Cbx3* to show maximum gene body DCM labelling on days 6 and 8,  
224 and enrichment of RING1B and CBX3 was confirmed in CD44 positive ISCs (Fig 5b, Sup Fig 7a). In  
225 contrast, DCM gene body labelling of canonical PRC1 members *Cbx2,4,6,7* and 8 was below background  
226 levels, indicating that involvement of PRC1 in ISC maintenance is mediated through ncPRC1 complexes  
227 (Fig 5a)(Blackledge et al., 2014). To investigate the role of PRC1 and PRC2 in promoter and enhancer  
228 regulation during ISC to enterocyte differentiation, we examined enrichment of H2A119ub or  
229 H3K27me3, catalysed by PRC1 and PRC2 respectively, using ISC, crypt and enterocyte ChIP-seq data  
230 sets (Chiacchiera et al., 2016a; Ferrari et al., 2021). This analysis revealed a lack of enrichment of both  
231 H2Aub119 and H3K27me3 at enhancers at any stage of ISC differentiation (Fig 5c). Similarly, these  
232 modifications were excluded from TSSs at all stages of ISC differentiation (Sup Fig 7b).

233 Several *Hp1* associated factors involved in maintenance of constitutive heterochromatin also belonged  
234 to clusters 6 and 8 (Sup Fig 7c). Nevertheless, only moderate enrichment of its target H3K9me3 (and  
235 no enrichment of H3K9me2) was detected in the crypt (Sup Fig 7d). Similar to PRC1/2 mediated histone  
236 modifications, analysis of published H3K9me3 ChIP-seq data did not reveal enrichment of H3K9me3  
237 on enhancers and genes active at different stages of the ISC to enterocyte differentiation (Fig 5c, Sup  
238 Fig 7b). These results suggest that chromatin modifying complexes PRC1, PRC2 and HP1 complex  
239 members are enriched in the ISC but challenge the notion that they regulate differentiation associated  
240 genes through active repression of promoter and enhancer sequences.

241

#### 242 ***H2A.Z is loaded on enterocyte specific enhancers in ICS.***

243 The absence of heterochromatin mediated regulation of intestinal specific enhancers and promoters  
244 suggests that activation signals and TF networks may play a dominant role during ISC differentiation.  
245 Histone variant H2A.Z has been implicated in lineage specific gene activation (Giaino et al., 2019).  
246 H2A.Z incorporation is mediated by *Srcap* and *P400*, which both peak on days 6 and 8, and is preceded  
247 by H2A acetylation, which showed marked enrichment in ISCs whereas HA2.Z is more uniformly

248 distributed in the crypts and villi (Fig 6a-c). Using ISC and enterocyte specific ChIP-seq data we found  
249 that H2A.Z accumulation at ISC and enterocyte specific TSSs (Sup Fig 8a)(Kazakevych et al., 2017).  
250 Interestingly, enhancers that become active in enterocytes peaking on day 1 or day 2 showed  
251 enrichment of H2A.Z both in ISCs and enterocytes (Fig 6d). No H2A.Z enrichment was observed at ISC  
252 specific enhancers peaking on day 6 or day 8, indicating that H2A.Z pre-marks enhancers in ISCs that  
253 are poised for activation in enterocytes, and suggest a distinct role for H2A.Z in enhancer and gene  
254 activity regulation. HOMER motif enrichment analysis of H2A.Z enhancer peaks present in enterocytes  
255 revealed enrichment of TF binding sites for factors involved in Notch signalling (RBPJ and SPDEF) and  
256 several targets of the EGF signal transduction pathway including ELK1, ELK4, cMYC, and cJun,  
257 suggesting a role for these pathways in H2A.Z recruitment (Sup Fig 8b). These findings emphasize the  
258 presence of an ISC-specific chromatin landscape to maintain ISC stemness and lineage identity, and to  
259 prepare and delineate enterocyte specific enhancers and genes for future activation upon cell  
260 differentiation.

261

### 262 ***The absorptive-secretory switch in ISC differentiation***

263 To better understand cell state changes in enterocyte differentiation we performed KEGG pathway  
264 analysis on DCM-labelled genes and found enrichment of pathways including absorption and TGF-beta  
265 signalling at early time points. Pathways including cell cycle, Wnt, EGF and Notch signalling showed  
266 enrichment at later time points, consistent with their lineage history (Fig 7a, Sup Table 5). Notch  
267 signalling controls the absorptive versus secretory cell fate decision dictating repression of *Atoh1* in  
268 the ISC and enterocyte progenitors through action of *Hes1,3* and *5* (Fig 7b). Loss of contact of  
269 proliferating ICSs (Notch+) with Paneth cells expressing the Notch ligand *Dll1* leads to downregulation  
270 of *Notch1* and subsequent upregulation of *Atoh1* in future secretory cells (Beumer and Clevers, 2020).  
271 Notch mediated repression of *Atoh1* and its key target genes *Spdef* and *Gfi1* could involve a gradual  
272 transition from a bi-potential progenitor to one cell state or may involve a binary switch towards the

273 absorptive or secretory lineage. Single cell RNA-seq data demonstrated predominant expression of  
274 *Atoh1*, *Spdef* and *Gfi1* in secretory cell types, but also revealed several cells that appear committed to  
275 the absorptive lineage to express at least one of these genes (Fig 7c). In addition, a few cells express  
276 both *Notch* and *Atoh1* or don't express *Notch* and *Atoh1* at all, making it difficult to discern how the  
277 absorptive-secretory switch is mediated (Sup Fig 8c). Examination of DCM-TM data indicated that  
278 *Notch1* as well as Notch target genes including *Hes1*, *Hes3* and *Hes5* are expressed throughout  
279 enterocyte differentiation (Fig 7d,e). In contrast, DCM methylation in gene bodies of *Spdef* and *Gfi1*  
280 never got above background levels (Mann-Whitney significance test  $p > 0.05$ ), suggesting their  
281 activation results in irreversible commitment towards the secretory lineage. These results  
282 demonstrate that, unlike the transition from the ISC into the absorptive state, the switch towards a  
283 secretory state represents a binary one directional switch rather than a gradual transition of,  
284 transcriptional programs (Fig 7f,g).

285

286

## 287 **Discussion**

288 To facilitate whole genome cell state tracing, we developed a system to epigenetically tag transcribed  
289 genes to be examined at later stages of development or differentiation in vivo. We applied this DCM-  
290 TM technology to perform whole transcriptome and enhancer activity lineage tracing of specific cell  
291 types, and demonstrated the possibility to establish TFs and signal transduction roadmaps through  
292 isolation of a differentiated cell type without the need to isolate progenitor or stem cells and without  
293 the need to infer connectivity in silico. We identified novel marker genes for different cell states and  
294 provide new insights into the transcriptional dynamics during cellular differentiation in the mouse  
295 intestine.

296 Key parameters for an epigenetic lineage tracing system to work are the application of an epigenetic  
297 tag that is normally absent in mammalian cells, is maintained and propagated upon DNA synthesis,  
298 and does not interfere with gene expression. Our study showed that DCM methylation approaches  
299 these criteria simultaneously. DCM methylation is only present at low levels in wildtype ES cells and  
300 intestinal epithelium (2-3%), while only a 5-fold and 25-fold induction in ES cells and intestinal  
301 epithelium, respectively, is sufficient to reliably identify active genes and enhancers and trace their  
302 activity back in time. In contrast to other forms of bacterial methylation which are not propagated such  
303 as DAM, propagation of DCM methylation is 78% in the intestinal epithelium (van Steensel and  
304 Henikoff, 2000). This is lower than previously described, but sufficient to detect gene body and  
305 enhancer labelling over at least 10 cell divisions (Clark et al., 1995). Lastly, we found that only a limited  
306 number of genes is affected by induction of the fusion protein. This lack of interference with  
307 transcription might be related to the fact that gene bodies of active genes already accumulate CpG  
308 methylation, thought to repel intragenic initiation of RNA pol2 (Neri et al., 2017). In addition, as the  
309 DCM motif is found much less frequently in genes it may thus have only limited effect on transcription.

310 In this study we applied DCM-TM to understand the mechanism directing the absorptive-secretory  
311 switch in the intestinal epithelium involving the Notch signalling pathway. Activation of *Notch* and its

312 downstream *Hes* family targets is mediated by cell-cell contact through direct contact of Notch and its  
313 ligand Dll. Notch signalling is required for maintenance of the ISC where Notch ligands are expressed  
314 by Paneth cells, but also during ISC differentiation to consolidate the absorptive lineage (VanDussen  
315 et al., 2012). In the secretory lineage Notch is downregulated resulting in de-repression of *Atoh1* and  
316 its downstream targets *Gfi1* and *Spdef*. Our DCM-TM data demonstrates that Notch signalling remains  
317 active throughout enterocyte differentiation and that *Spdef* and *Gfi1* are never activated. This indicates  
318 that the absorptive-secretory lineage fate decision involves a committed rather than a temporarily  
319 dynamic absorptive-secretory intermediate state. Nevertheless, *Atoh1* is active in ISCs and cells that  
320 commit to the absorptive lineage, probably as a consequence of fluctuating Notch activity and to be  
321 able to quickly respond when *Notch* levels decrease below a specific threshold for locking in the  
322 secretory state. This finding explains why *Atoh1* lineage tracing studies revealed *Atoh1* positive cells to  
323 contribute to the ISC pool (Ishibashi et al., 2018), and also indicates that this *Atoh1* expression level is  
324 too low to activate *Spdef* and *Gfi1* and the downstream secretory program.

325 Our study and studies of others indicate that the role for complexes in heterochromatin formation and  
326 maintenance in ISC differentiation associated gene expression dynamics is very limited. Previous  
327 studies involving loss of PRC1 members *Bmi1* or *Ring1b* suggested that PRC1 is required for ISC  
328 maintenance by preventing ectopic expression of non-lineage genes (Chiacchiera et al., 2016a; Lopez-  
329 Arribillaga et al., 2015). Application of DCM-TM revealed that PRC1 mediated gene repression is  
330 mediated by non-canonical PRC1 complexes that contain RYBP which catalyses H2A ubiquitination  
331 independent of PRC2. This is in line with the observation that loss of PRC2 and H3K27me3 does not  
332 affect H2A119ub in the intestine (Chiacchiera et al., 2016b). The present study also revealed a static  
333 landscape of repressive chromatin modifications H2A119ub, H3K27me3 and H3K9me3 in intestinal  
334 homeostasis. Similarly, DNA methylation changes were found to be very limited between different  
335 epithelial cell types (Kaaij et al., 2013), suggesting that the main role of facultative and constitutive  
336 heterochromatin in ISCs is dictating repression of non-lineage genes. Therefore, activation and  
337 repression of enhancers and genes in intestinal homeostasis appears to be regulated by other

338 epigenetic mechanisms and transcription factor networks. We found histone variant H2A.Z to be  
339 loaded on enhancers in ISCs that are destined to become activated in enterocytes, indicating that the  
340 ISC dictates and limits enhancer activity in its decedents through H2A.Z recruitment to enhancers. The  
341 clear enrichment of motifs of EGF and Notch regulated transcription factors in these enhancers make  
342 both signalling pathways the likely candidate signal for H2A.Z recruitment.

343 Several cell state tracing technologies detecting the history of gene expression have been described  
344 before. These include CRISPR spacer mediated recording of DNA or RNA to monitor complex cellular  
345 behaviour retrospectively, as well as smFISH based detection of Crispr/Cas mediated targeted  
346 disruption of expressed recording elements (Frieda et al., 2017; Schmidt et al., 2018). Unfortunately,  
347 all these technologies are restricted by a limited number of genes that can be recorded. The recent  
348 developments in scRNA-seq provides alternative means to detect cell states and gene expression  
349 changes in relation to developmental trajectories. Temporal changes in abundance of spliced and un-  
350 spliced gene products (La Manno et al., 2018), and minimum spanning tree analysis (Monocle) have  
351 been applied to predict cell trajectories in silico (Trapnell et al., 2014), but these analyses are limited  
352 by the temporal resolution and the number of genes detected, and therefore often fail to detect the  
353 changes in gene expression from one cell state to the next, and are more difficult to apply along  
354 developmental trajectories. The present DCM-TM technology circumvents these issues providing a  
355 genome wide picture of gene and enhancer activity at any timepoint during development or  
356 differentiation. The DCM-TM transgene can be combined with conventional lineage tracing  
357 technologies to fine map cell fate decisions, discriminate between lineage paths and keep track of  
358 network changes. In addition, DCM-TM can be applied to follow embryonic development and tissue  
359 regeneration, providing a powerful system to identify temporal maps of transcription factor networks  
360 and signal transduction pathways that can be used to improve stem cell expansion and cell  
361 differentiation models.

362 **Acknowledgements**

363 We would like to thank Guillaume Jacquemin and Silvia Fre for providing protocols for enterocyte  
364 isolation, Jonathan Klaver for help, Riccardo Fodde and Joana Carvalho Moreira de Mello and  
365 department members for helpful discussions.

366

367 **Author contributions**

368 R.G.B., J.B.B, B.T, M.C. and J.G. conceived and performed the experiments and data analysis. E.W., E.S,  
369 W.I.J., E.M. and Y.H. assisted in immunocytochemistry, FACS analysis, sequence analysis and modelling.  
370 J.L. E.G.S. and W.B. aided in development of DCM-TM and interpreting the results, and M.L. helped  
371 with motif analysis. All authors discussed the results and contributed to the final manuscript.



## Figure 1

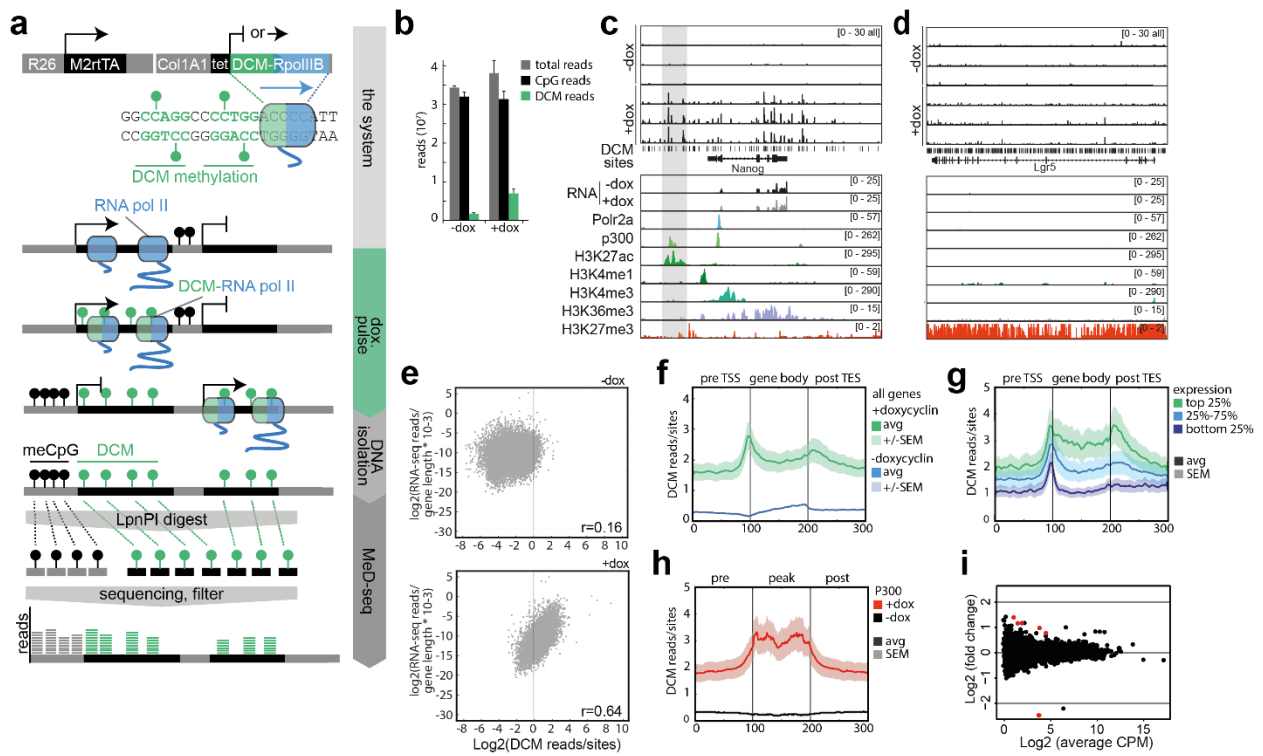

372

373 **Figure 1. The DCM-time-machine in embryonic stem cells.**

374 (a) Overview of the DCM-TM and MeD-seq pipelines. (b) Induction of DCM labelling measured 5 days  
 375 after start of dox treatment. (c,d) Genome browser view of DCM specific MeD-seq reads (n=3), RNA-  
 376 seq (+/- dox) and ChIP-seq tracks (ENCODE) in the *Nanog* (c, enhancer indicated in grey) and *Lgr5* (d)  
 377 loci. (e) Scatter plot displaying RNA-seq gene expression level in relation to DCM read count per gene  
 378 before (top panel) and after dox induction (bottom panel). (f) Gene meta-analysis showing binned  
 379 distribution of DCM reads overlapping the gene body before (blue) and after (green) 5 days of dox  
 380 treatment. The average (avg) and standard error of the mean (SEM) are depicted with a darker line  
 381 and lighter region, respectively. (g) Gene meta-analysis showing distribution of DCM reads of  
 382 expressed genes split in three clusters based on expression (top 25%, 25%-75% and bottom 25%) after  
 383 5 days of dox treatment. (h) DCM read meta-analysis showing binned distribution of DCM read counts  
 384 over p300 positive genomic regions and 1kb proximal and distal flanking regions. (i) RNA-seq analysis  
 385 comparing average gene expression values before and 5 days after dox induction (genes indicated in  
 386 red show significant expression change).

## Figure 2

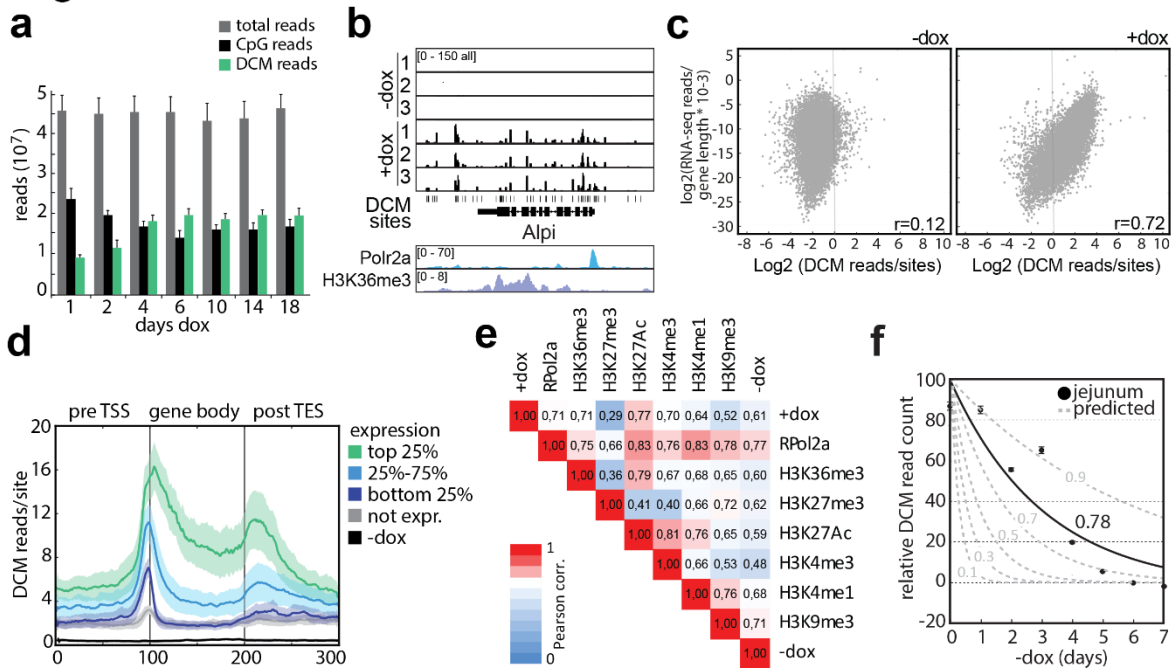

387

388 **Figure 2. DCM labelling and propagation in the small intestine.**

389 (a) Genome wide DCM and CpG methylation at different time points after start of dox induction. (b)  
390 Genome browser view of *Alpi* locus showing DCM specific MeD-seq reads before and after 1 day dox  
391 treatment. Polr2a and H3K36me3 ChIP-seq tracks from ENCODE are shown below. (c) Scatter plot  
392 displaying RNA-seq gene expression level in relation to DCM read count per gene before (left panel)  
393 and after 10 days of dox induction (right panel) in epithelium of jejunum. (d) Gene meta-analysis  
394 showing distribution of DCM reads in the top 25%, 25%-75% and bottom 25% expressed genes after 3  
395 days of dox treatment. (e) Pearson correlation analysis comparing DCM and ChIP-seq read count  
396 distribution. (f) Relative DCM read count measurement at different time points after withdrawal of  
397 dox and the estimated propagation rate per cell division in jejunum. The dotted grey lines show the  
398 estimated curves based on several different propagation rates, whereas the propagation rate fitted to  
399 the DCM data is plotted in black.

### Figure 3

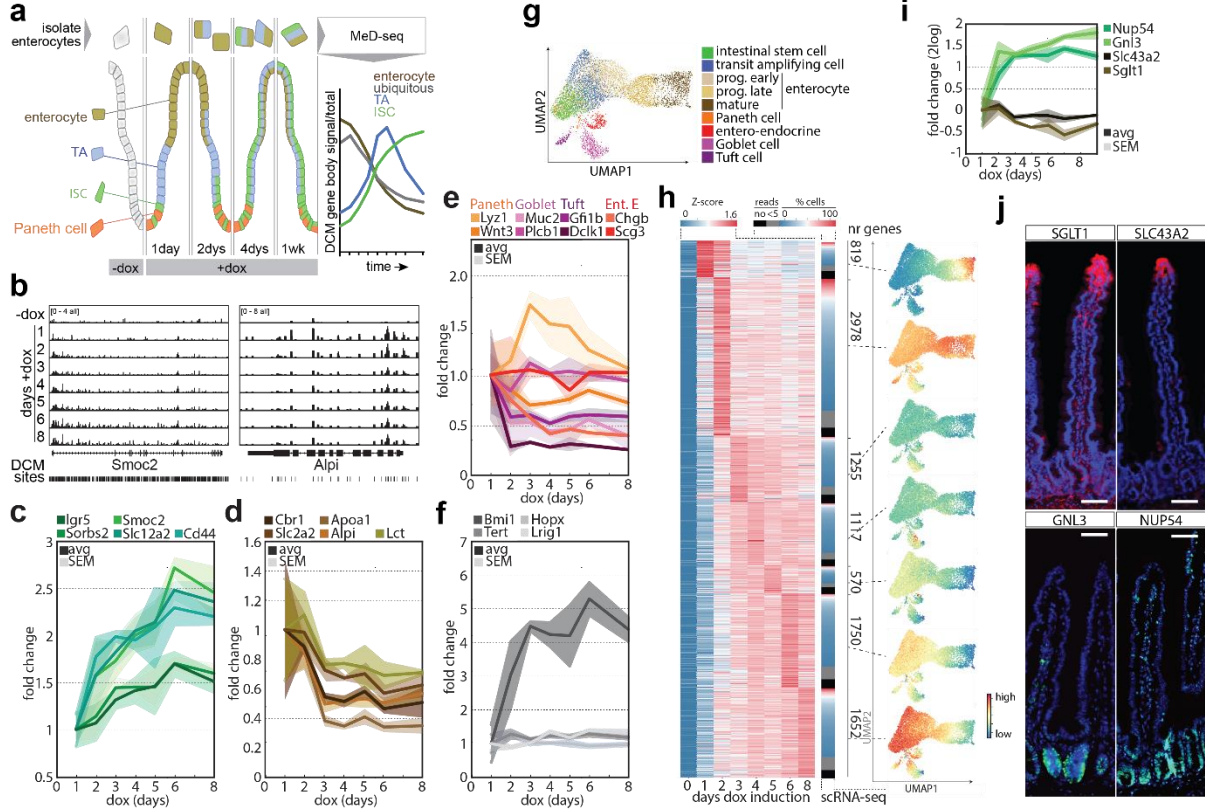

400

401 **Figure 3.** DCM-Rpol2b labelling reveals gene activity maps from ISC to enterocyte.

402 (a) Overview of experimental procedure: mice are labelled with dox and sacrificed at different time  
 403 points to isolate Epcam+/SLC2A2+ positive enterocytes that are subjected to MeD-seq. ISC, TA,  
 404 enterocyte and ubiquitously expressed genes are expected to display different dynamic behaviour in  
 405 time. (b) Genome browser view of the average normalized MeD-seq DCM reads (n=3) in the *Lgr5* and  
 406 *Alpi* loci at different time points after start of dox treatment. (c-f) DCM labelling (fold change in DCM  
 407 reads relative to total and normalized to T=1d) of ISC (c), enterocyte (d), Paneth, Goblet, Tuft, Entero-  
 408 endocrine (e) and +4 cell (f) specific genes. (g) UMAP of jejunum scRNA-seq data showing clusters  
 409 annotated as specific cell types. (h) DCM labelling of all significantly labelled genes (negative (T=0)  
 410 samples compared to all days after start of dox treatment) clustered according to the maximum DCM  
 411 signal, capture of clustered genes by scRNA-seq (for each gene with >5 reads percentage of cells with  
 412 signal is indicated), and average expression of clustered genes in UMAP shown in (g). (i-j) DCM labelling

413 (i) and validation by immuno-cytochemistry (j) of SGLT1, SLC43A2, GNL3 and NUP54 expression (FITC,  
414 DNA is DAPI stained, scale bar: 50 $\mu$ m).

415

## Figure 4

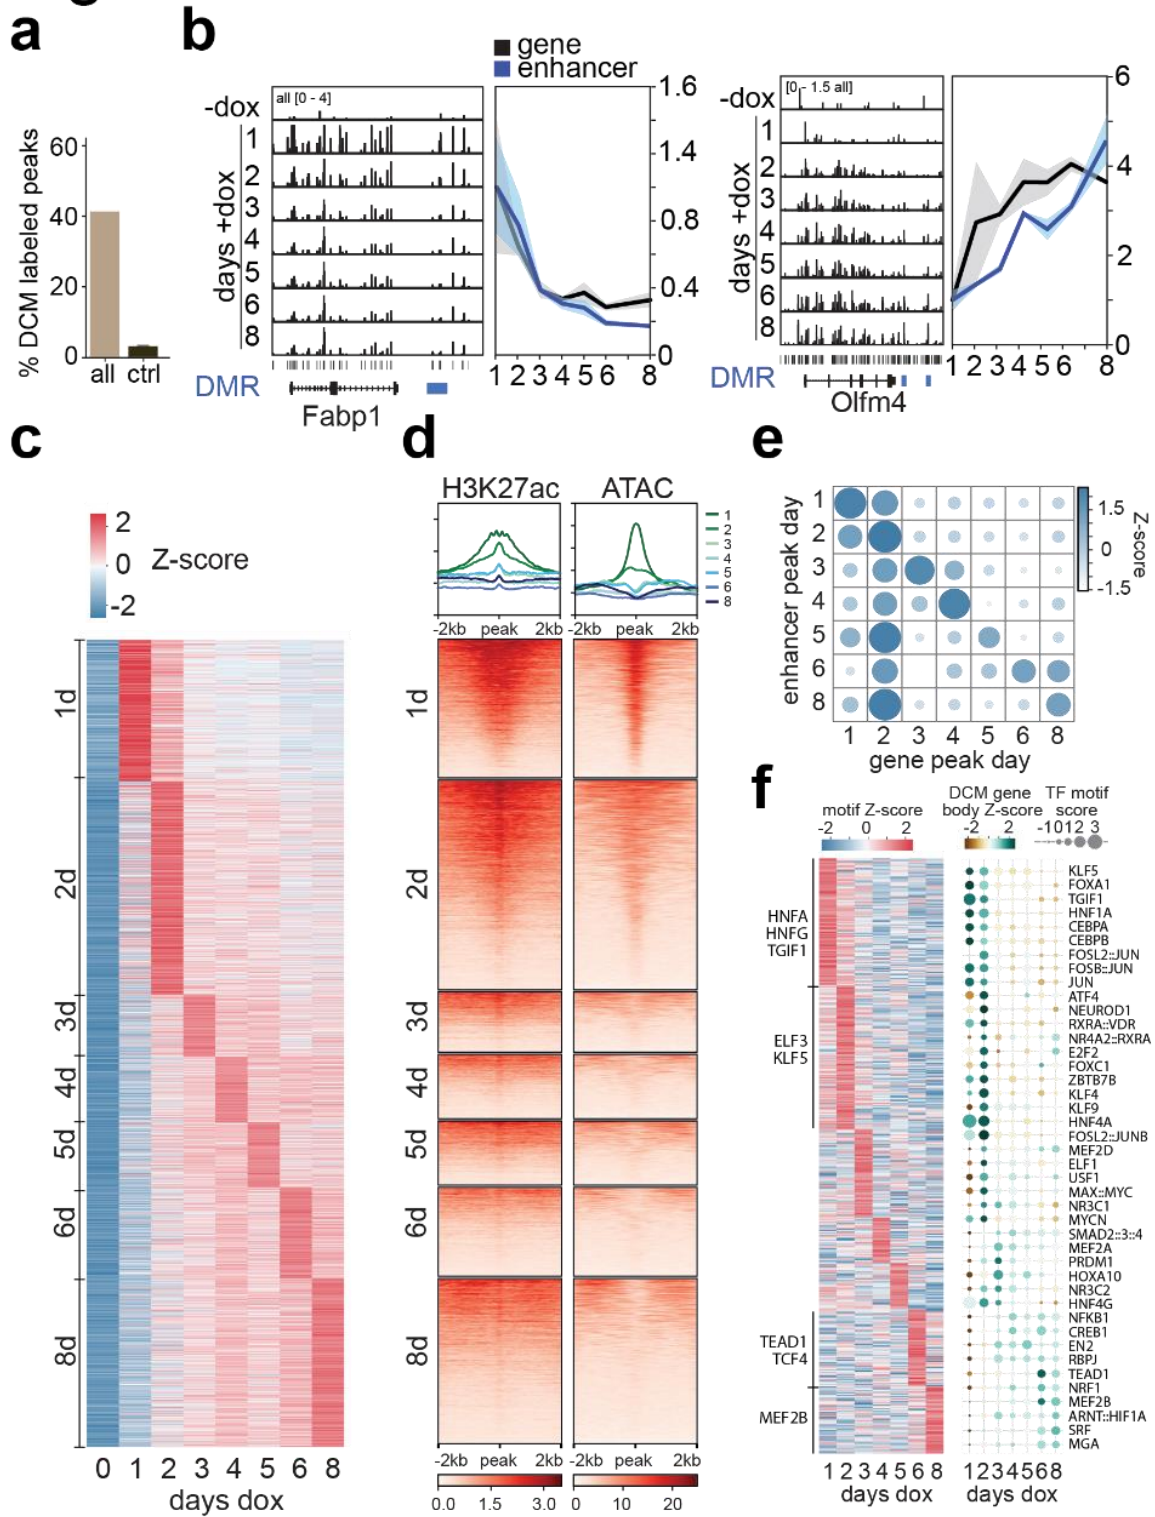

419 **Figure 4.** *Temporal changes in TF and enhancer activity from ISC to enterocyte.*

420 (a) Percentage of H3K27ac peaks that are labelled by DCM (i.e. peaks with  $\geq 1$  significant DCM site <750  
421 bp from peak). Random control based on 100 sets of reshuffled H3K27ac peaks is added to show  
422 expected random overlap (mean  $\pm$  SD). (b) Left panels display genome browser view showing DCM  
423 labelling of enterocyte specific (*Fabp1*) and ISC specific (*Olfm4*) genes with nearby enhancers (marked  
424 in blue) showing coordinated behaviour in time. Right panels show the average profiles over time for  
425 each gene and the average of the closest significant DCM sites. (c) Heatmap of DCM labelling of  
426 enhancers (Z-scores of mean normalized DCM reads). (d) Heatmap showing H3K27ac ChIP-seq and  
427 ATAC-seq overlap with the regions around enhancer DMRs peaking at different days of dox induction.  
428 Each profile plot has the same y-axis range as its corresponding heatmap. (e) Correlation between gene  
429 peak day and peak day of close-by enhancers (z-score of proportion of enhancers per day). (f) Heatmap  
430 showing TF motif dynamics observed in intergenic DCM DMRs in time (left) and combined analysis of  
431 motif enrichment and DCM gene body labelling dynamics of TFs displaying a positive correlation in  
432 time (right).

433

## Figure 5

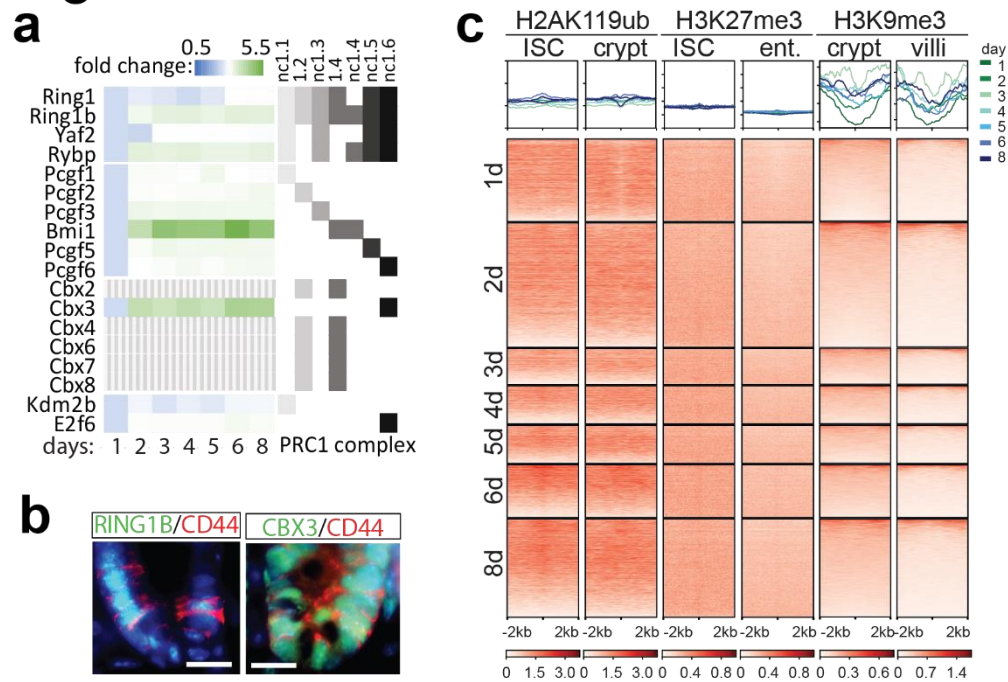

434

435 **Figure 5. Lack of heterochromatin dynamics at intestinal enhancers.**

436 (a) Temporal behaviour of DCM methylation (normalized to t=1 day) of members of different PRC1  
437 complexes (genes indicated in dashed grey do not accumulate DCM signal above background). (b)  
438 Immunofluorescence detection of RING1B (FITC), CBX3 (FITC) and CD44 (Texas Red) in the intestinal  
439 crypt (DNA=DAPI, scale bar: 16 $\mu$ m). (c) Heatmap showing H2A119ub, H3K27me3 and H3K9me3 ChIP-  
440 seq overlap in indicated cell types with the regions around enhancer DMRs peaking at different days  
441 of dox induction. Each profile plot has the same y-axis range as its corresponding heatmap.

442

## Figure 6

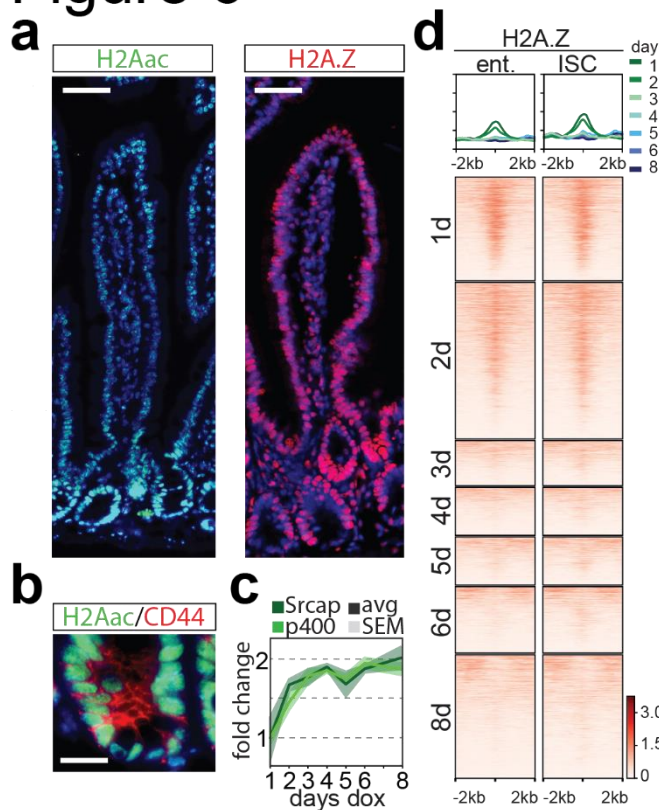

443

444 **Figure 6** *H2A.Z* is recruited to enterocyte specific enhancers in ISCs.

445 (a) Immunocytochemistry detecting H2Aac (FITC) and H2A.Z (Texas Red) (DNA=DAPI, scale bar: 50 $\mu$ m),

446 and (b) combined detection of H2Aac (FITC) and CD44 (Texas Red) in the intestinal crypt (DNA=DAPI,

447 scale bar: 16 $\mu$ m). (c) DCM labelling (fold change in DCM reads relative to total and normalized to T=1d)

448 of *Srcap* and *P400*. (d) Heatmap showing H2A.Z ChIP-seq overlap in enterocytes and ISC with the

449 regions around enhancer DMRs peaking at different days of dox induction. Enhancers were ordered

450 according to H3K27ac and ATAC-seq enrichment (fig 4d). Each profile plot has the same y-axis range

451 as its corresponding heatmap.

452



## Figure 7

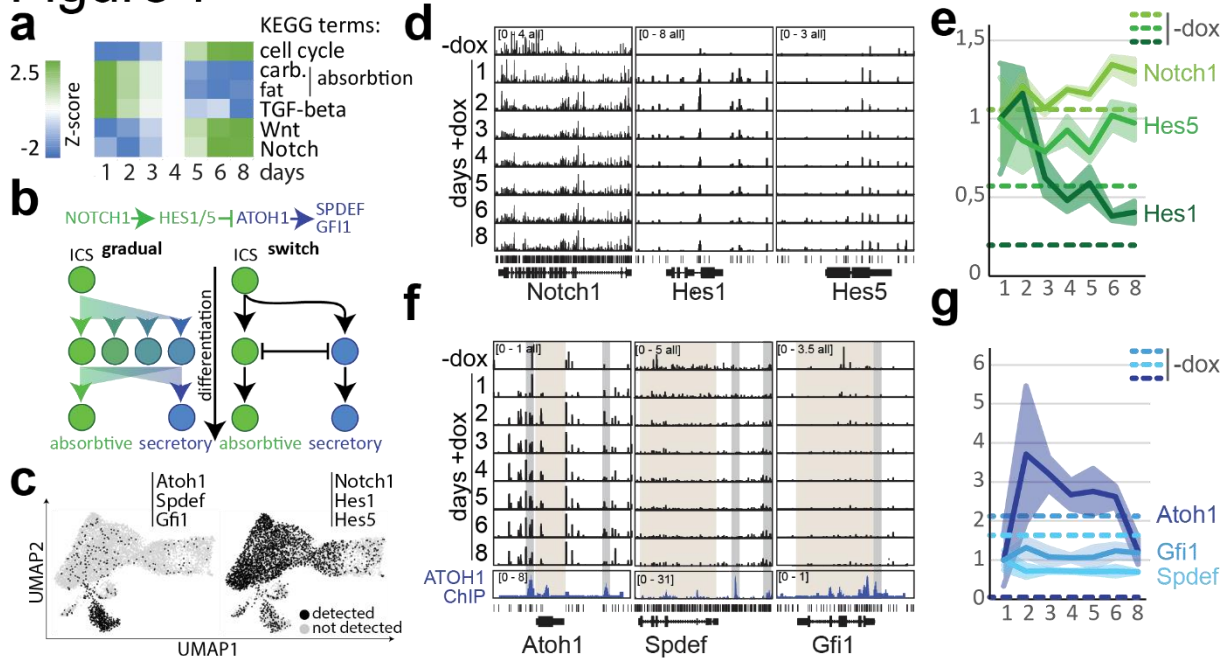

453

454 **Figure 7. Notch signalling in absorptive versus secretory cell fate decision.**

455 (a) KEGG pathway enrichment analysis at different time points after start of dox treatment. (b) Notch  
 456 signalling pathway in intestinal stem cell differentiation towards absorptive and secretory lineage; two  
 457 possible mechanisms involving a gradual change or an on/off switch in Notch signalling are shown. (c)  
 458 Cells expressing at least one of following three genes; *Atoh1*, *Spdef*, and *Gfi1* (left) or *Notch1*, *Hes1* and  
 459 *Hes5* (right) in scRNA-seq shown in UMAP of Figure 4g. (d,e) Genome browser view of MeD-seq DCM  
 460 reads in *Notch1* and its target genes *Hes1* and *Hes5* (d), and quantification of DCM signal normalized  
 461 to day 1 (dashed lines represent -dox signal per gene). (f,g) As in (e,f) but now for *Atoh1*, *Spdef* and  
 462 *Gfi1*. Bottom tracks in (f) show ATOH1 ChIP-seq signal from *Atoh1* GFP+ cells from the small intestine  
 463 (ATOH1 targeted regulatory regions are indicated in grey and gene bodies in brown).

## Supplementary Figure 1

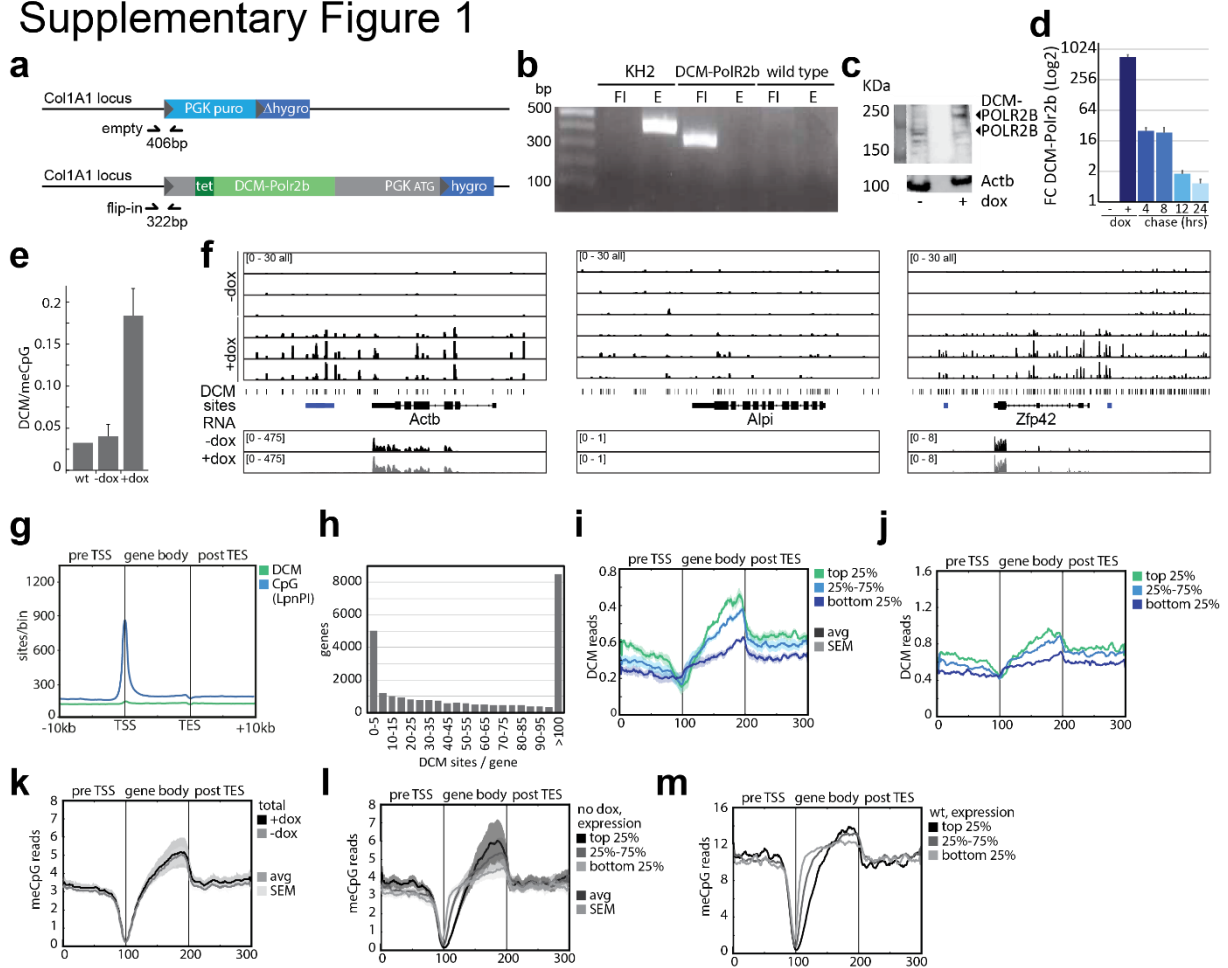

464

### 465 Supplementary Figure 1

466 (a) The DCM-Polr2b fusion gene was introduced in the Col1A1 locus by Flipase mediated insertion. (b)  
 467 PCR with primers for flip-in (FI) and empty (E) indicated in (a) verifying proper integration of the  
 468 transgene. (c) Western blotting analysis detecting POLR2B, DCM-POLR2B and ACTB in uninduced and  
 469 induced ES cells. (d) qRT-PCR analysis detecting DCM-POLR2B transcript in ES cells at different  
 470 timepoints (hours) after removal of dox. (e) The ratio of DCM/CpG methylation genome wide in wild  
 471 type (WT), DCM- Polr2b -dox and +dox ESCs. (f) Genome browser view of DCM specific MeD-seq reads  
 472 in the *Actb*, *Alpi* and *Zfp42* loci (intergenic DMRs are indicated in blue). (g) Gene meta-analysis showing  
 473 binned distribution of DCM and CpG sites. (h) Histogram showing distribution of DCM sites per gene.  
 474 (i) Gene meta-analysis showing binned distribution of DCM reads in the top 25%, 25%-75% and bottom  
 475 25% expressed genes in DCM- Polr2b ESCs in the absence of dox. (j) As in (i) but now for wild type ESCs

476 (n=1). (k) Gene meta-analysis showing binned distribution of all CpG reads before and after dox  
477 treatment (5 days). (l) Gene meta-analysis showing binned distribution of CpG reads in the top 25%,  
478 25%-75% and bottom 25% expressed genes in DCM- Polr2b ESCs in the absence of dox. (m) As in (l)  
479 but now for wild type ESCs (n=1).

## Supplementary Figure 2

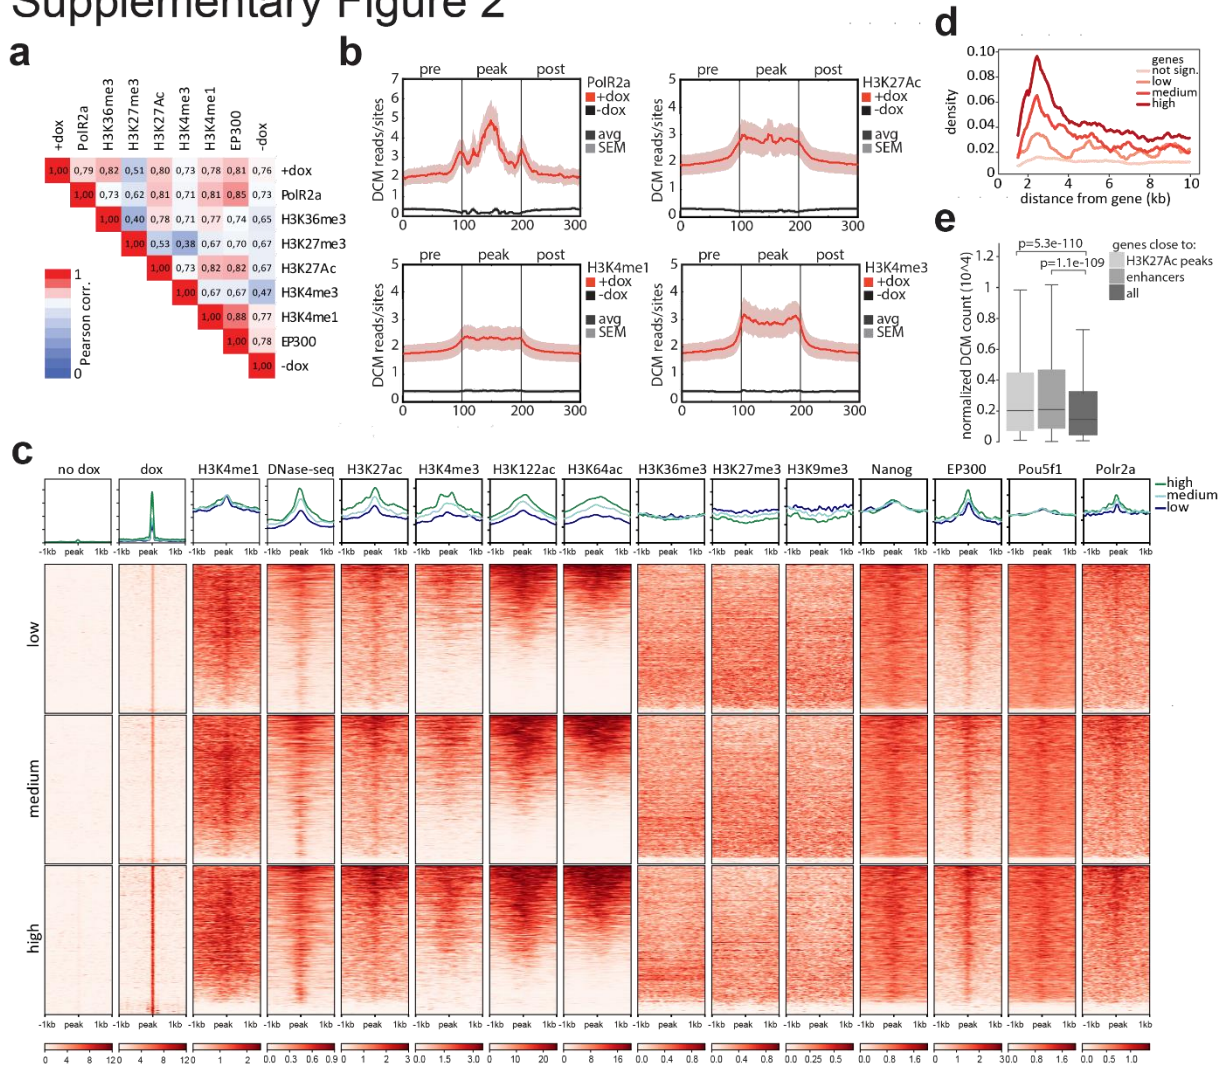

480

### 481 Supplementary Figure 2

482 (a) Pearson correlation analysis comparing DCM and ChIP-seq read count distribution. (b) Enhancer  
 483 meta-analysis showing binned distribution of DCM read counts over Polr2a, H3K27Ac, H3K4me1 and  
 484 H3K4me3 positive genomic regions and 1kb proximal and distal flanking regions. (c) Heatmap showing  
 485 ChIP-seq overlap with the regions around enhancer DMRs. DMRs are split in three equal clusters based  
 486 on the normalized number of reads for +dox. Each profile plot has the same y-axis range as its  
 487 corresponding heatmap. (d) Density plot showing the number of enhancer DMRs in the 10kb region  
 488 around genes that were either not significantly labelled by DCM or genes split in three equal clusters  
 489 based on fold change between +dox and -dox. (e) Normalized DCM count of +dox samples for genes

490 close to the enhancer DMRs, close to H3K27ac peaks and all genes. P-values were calculated using a  
491 one-sided Wilcoxon rank-sum test.

492

## Supplementary Figure 3

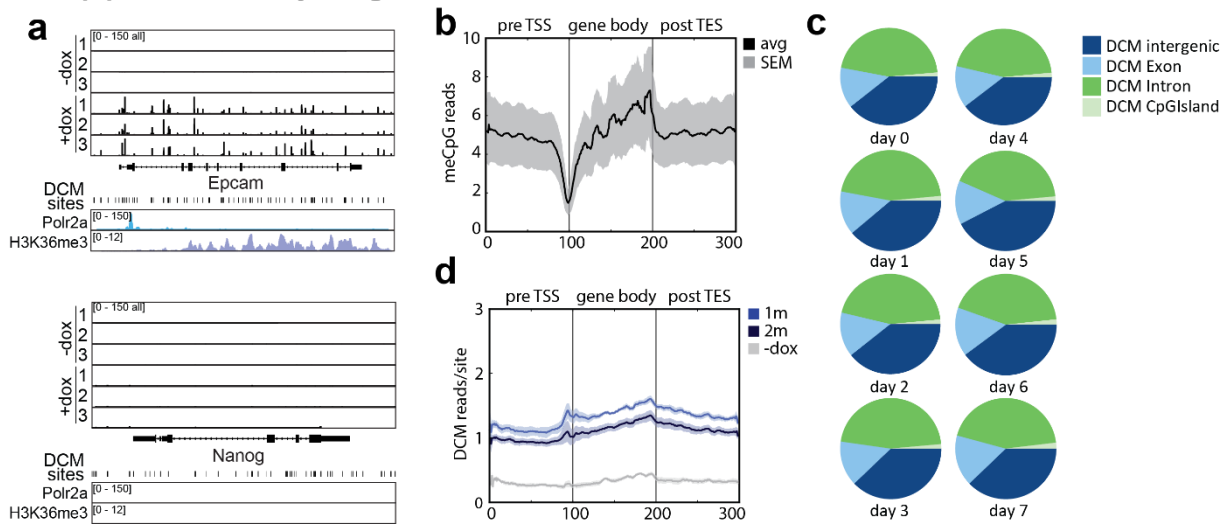

493

### 494 Supplementary Figure 3

495 (a) Genome browser view of *Epcam* and *Nanog* loci showing DCM specific MeD-seq reads before and  
 496 after 1 day dox treatment. POLR2a and H3K36me3 ChIP-seq tracks are shown below. (b) Gene meta-  
 497 analysis showing binned distribution of all CpG reads in the absence of dox. (c) Relative distribution of  
 498 DCM reads in intergenic, exonic, intronic and CpG island sequences at indicated days after removal of  
 499 doxycycline. (d) Gene meta-analysis showing binned distribution of DCM reads in -dox control mice  
 500 and mice treated for 7 days with dox followed by a 1 and 2 month chase prior to tissue harvesting.

## Supplementary Figure 4

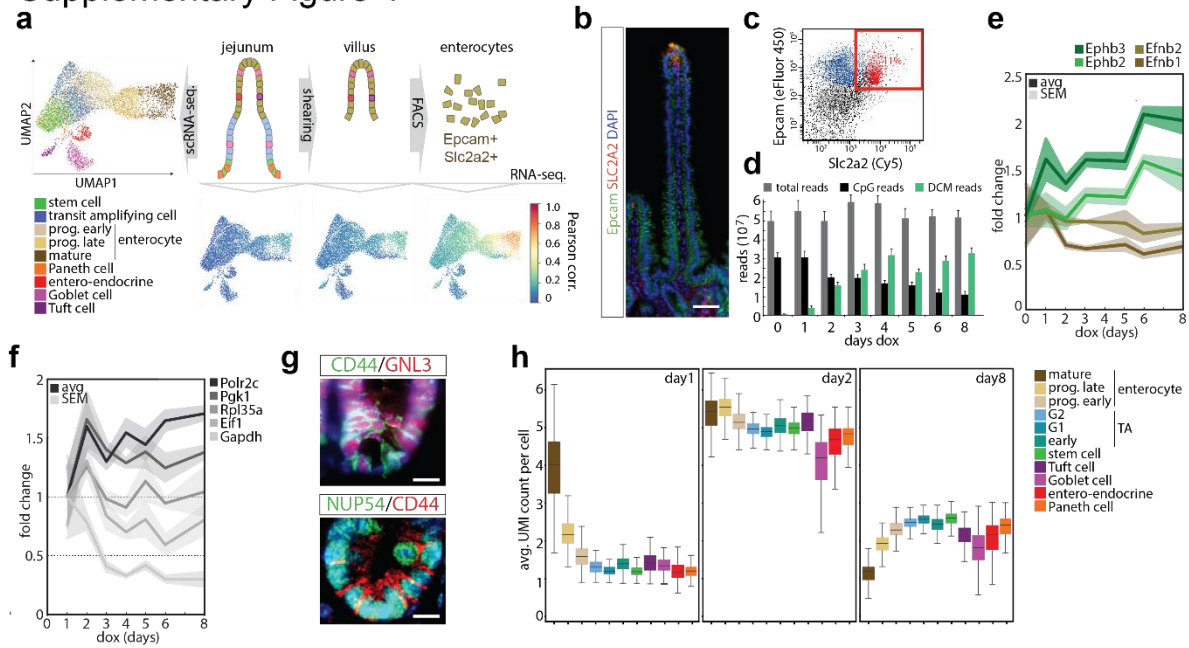

501

## 502 Supplementary Figure 4

503 (a) Overview of the experimental procedure to isolate SLC2A2 expressing enterocytes. Villi were  
 504 isolated from intestinal epithelium of jejunum followed by FACS isolation of SLC2A2 positive cells. Left  
 505 panel shows UMAP of scRNA-seq data colored according to annotation as specific cell types, bottom  
 506 panels show Pearson correlation analysis of bulk RNA-seq analysis on total epithelial, villi and SLC2A2  
 507 positive fractions with scRNA-seq data. (b) Immuno-cytochemistry detecting Epcam (FITC) and SLC2A2  
 508 (Texas red, DNA in DAPI, scale bar: 50µm). (c) FACS analysis of intestinal epithelial cells, SLC2A2 and  
 509 Epcam positive cells are highlighted in red. (d) Genome wide DCM and CpG methylation level at  
 510 different time points after start of dox induction. (e, f) DCM labelling (relative to total and normalized  
 511 to T=1d) of *Ephb2*, *Ephb3*, *Efnb1*, and *Efnb2* genes (e), and the ubiquitously expressed *Polr2c*, *Pgk1*,  
 512 *Rpl35a*, *Eif1* and *Gapdh* genes at different time points after start of dox treatment (f). (g)  
 513 Immunocytochemistry detecting GNL3 and NUP54 in combination with CD44 (DNA is DAPI, scale bar:  
 514 16µm) (h) Normalized UMI count distribution per cell type on day 1, 2 and 8 DCM labelling peak time  
 515 point, showing increased expression of genes at day 2.

## Supplementary Figure 5

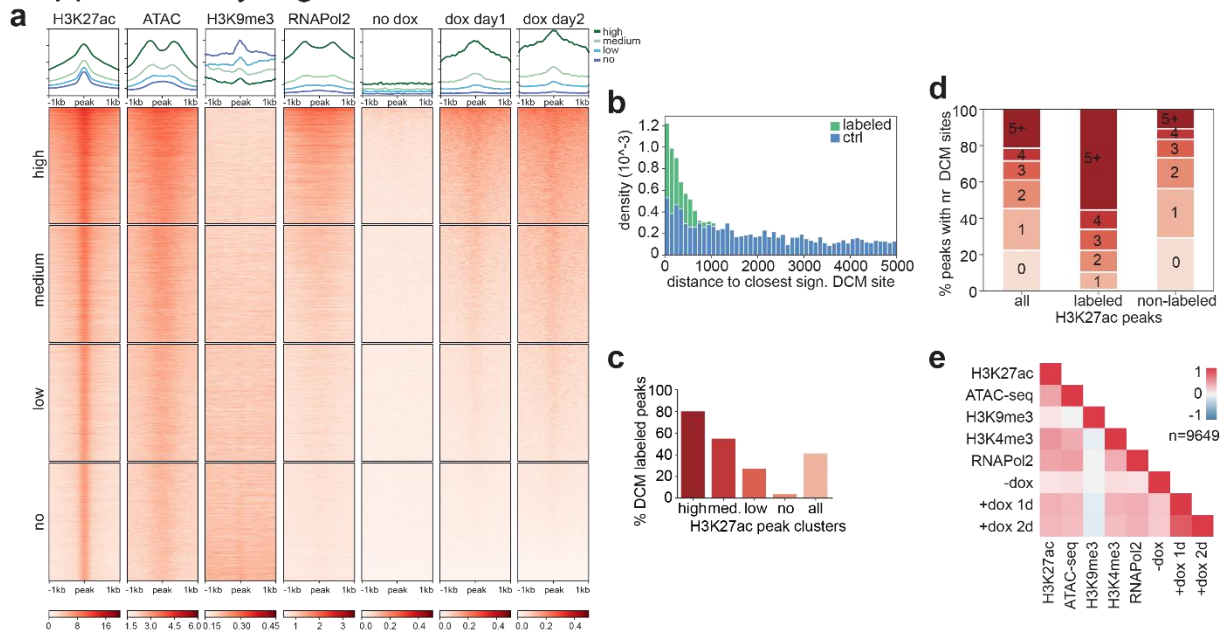

516

## 517 Supplementary Figure 5

518 (a) Heatmap showing the overlap of villi H3K27ac peaks with several villi ChIP-seq and DCM datasets.  
 519 All ChIP-seq datasets were generated from villi samples [Saxena et al. 2017] and the DCM data from –  
 520 dox samples and the day 1 and day 2 +dox samples are shown. H3K27ac peaks are ordered according  
 521 to overlapping DCM signal  $\pm 1$ kb of the peak center and split in four equally sized clusters based on this  
 522 ordering. Each profile plot has the same y-axis range as its corresponding heatmap. (b) Histogram with  
 523 the distance to the closest significant DCM site for both the DCM labeled H3K27ac peaks (i.e. peaks  
 524 with  $\geq 1$  significant DCM site) and random controls based on 100 sets of reshuffled H3K27ac peaks.  
 525 Density for each 100 bp bin up to 5kb is shown. (c) Percentage of H3K27ac peaks that are labelled by  
 526 DCM (i.e. peaks with  $\geq 1$  significant DCM site  $< 750$  bp from peak). The H3K27ac peaks are split in four  
 527 clusters based on H3K27ac intensity and related to all peaks. (d) Barplot showing the number of DCM  
 528 sites overlapping each peak. The percentages with each number of sites are shown for all peaks, the  
 529 labeled peaks (i.e. peaks with  $\geq 1$  significant DCM site) and non-labeled peaks (i.e. peaks without  
 530 significant DCM site). (e) Correlation heatmap showing the Spearman correlation at the H3K27ac peaks  
 531 between the different ChIP-seq and DCM datasets shown in (a). The number of reads overlapping each



532 H3K27ac peak with  $\geq 3$  DCM sites were normalized for the peak length or the number of DCM sites for  
533 the CHIP-seq and DCM datasets, respectively.

534

535

536

537

## Supplementary Figure 6

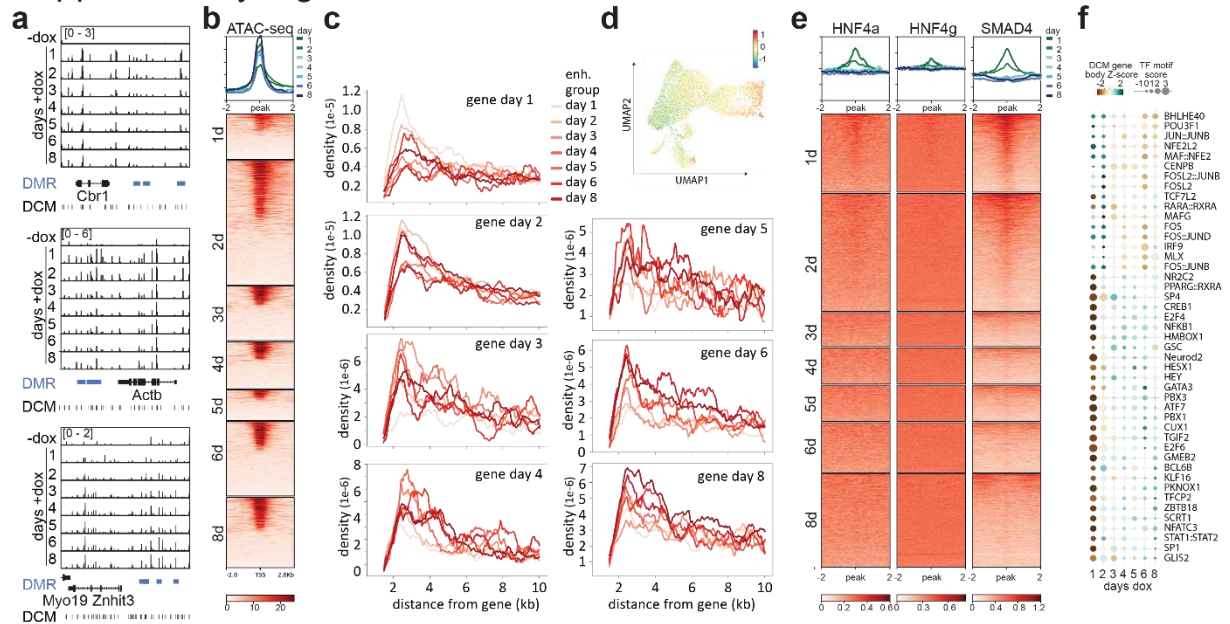

538

### 539 Supplementary Figure 6

540 (a) Genome browser view showing DCM labelling of enterocyte specific (*Cbr1*), ubiquitous (*Actb*) and  
 541 ISC specific (*Znhit3*) genes with enhancers (in blue) nearby showing similar behaviour in time. (b)  
 542 Heatmap showing ATAC-seq overlap with the regions around TSS of genes peaking at different days of  
 543 dox induction. (c) Density plot showing the number of enhancer DMRs per peak day in the 10kb region  
 544 around genes split in clusters based on peak timing of gene body DCM labelling. (d) Differential  
 545 enrichment of genes peaking on day 2 split by having relatively more enhancers peaking on day 2 or  
 546 day 8 nearby; difference in gene expression plot on UMAP showing increased expression of genes  
 547 linked to day 2 enhancers in enterocytes. (e) Heatmap showing ChIP-seq overlap for HNFa, HNFg and  
 548 SMAD4 with regions around enhancer DMRs. Enhancers were split in clusters based on the maximum  
 549 day of DCM accumulation. (f) (f) Combined analysis of motif enrichment and DCM gene body labelling  
 550 dynamics of TFs displaying a negative correlation in time (right).

## Supplementary Figure 7

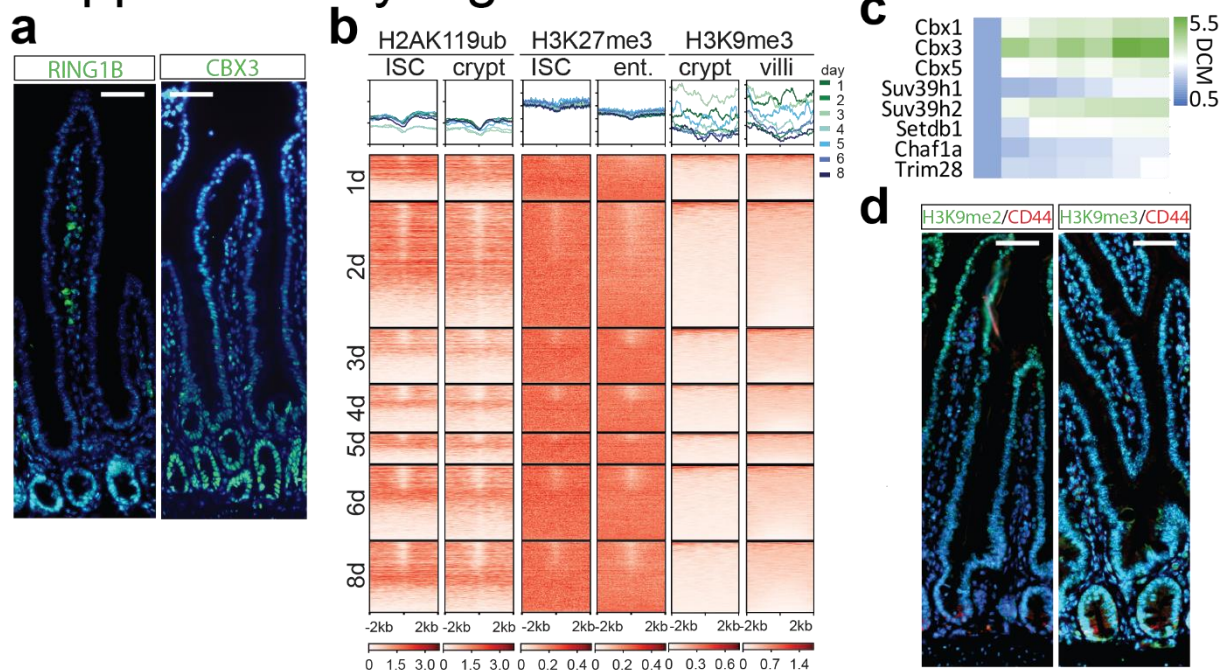

551

### 552 Supplementary Figure 7

553 (a) Immunocytochemistry detecting RING1B and CBX3 (FITC) (DNA=DAPI, scale bar: 50 $\mu$ m). (b)

554 Heatmap showing ChIP-seq overlap in enterocytes, ISC, crypt and villi for H2A119ub, H3K27me3, and

555 H3K9me3 with regions around the TSS DMRs. TSS were split in clusters based on the maximum day of

556 DCM accumulation and ordered according to H3K27ac and ATAC-seq enrichment. (c) Temporal

557 behaviour of DCM methylation (normalized to t=1 day) of genes encoding proteins involved in

558 establishment and maintenance of constitutive heterochromatin. (d) Immunocytochemistry detecting

559 H3K9me2 and H3K9me3 (FITC) in combination with CD44 (Texas Red, scale bar: 50 $\mu$ m).

560

## Supplementary Figure 8

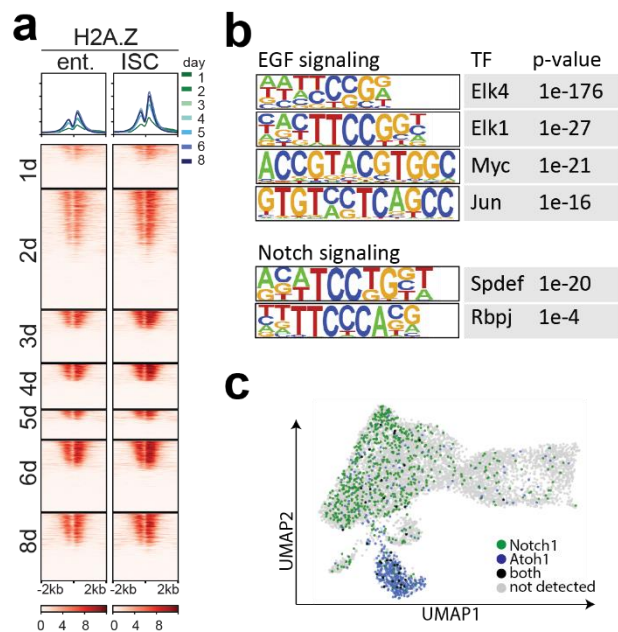

561

### 562 **Supplementary Figure 8**

563 (a) Heatmap showing H2A.Z ChIP-seq overlap in enterocytes and ISC with regions around the TSS  
564 DMRs. TSSs were split in clusters based on the maximum day of DCM accumulation and ordered  
565 according to H3K27ac and ATAC-seq enrichment. (b) HOMER motif analysis on H2A.Z enhancer peaks  
566 present in enterocytes revealing motif enrichment for TFs downstream of EGF and Notch signalling. (c)  
567 UMAP displaying cells in which only *Notch1* or *Atoh1* was detected and cells where both genes or no  
568 gene was detected (plotted in UMAP shown in Figure 4g).

569 **Supplementary Table 1**

570 Sequencing statistics.

571

572 **Supplementary Table 2**

573 Overview of gene body DCM counts in uninduced and induced ES cells and enterocytes.

574

575 **Supplementary Table 3**

576 Overview of intergenic differentially methylated DCM sites in uninduced and induced ES cells and

577 enterocytes.

578

579 **Supplementary Table 4**

580 Motif analysis on intergenic DMRs at different timepoints of dox induction in enterocytes.

581

582 **Supplementary Table 5**

583 KEGG pathway analysis on differential DCM labelling of genes upon dox induction.

584

585

586

587

## 588 References

- 589 Alemany, A., Florescu, M., Baron, C.S., Peterson-Maduro, J., and van Oudenaarden, A. (2018). Whole-  
590 organism clone tracing using single-cell sequencing. *Nature* *556*, 108-112.
- 591 Arand, J., Spieler, D., Karius, T., Branco, M.R., Meilinger, D., Meissner, A., Jenuwein, T., Xu, G.,  
592 Leonhardt, H., Wolf, V., *et al.* (2012). In vivo control of CpG and non-CpG DNA methylation by DNA  
593 methyltransferases. *PLoS Genet* *8*, e1002750.
- 594 Aranda, S., Mas, G., and Di Croce, L. (2015). Regulation of gene transcription by Polycomb proteins.  
595 *Sci Adv* *1*, e1500737.
- 596 Barker, N., van Es, J.H., Kuipers, J., Kujala, P., van den Born, M., Cozijnsen, M., Haegebarth, A.,  
597 Korving, J., Begthel, H., Peters, P.J., *et al.* (2007). Identification of stem cells in small intestine and  
598 colon by marker gene *Lgr5*. *Nature* *449*, 1003-1007.
- 599 Baron, C.S., and van Oudenaarden, A. (2019). Unravelling cellular relationships during development  
600 and regeneration using genetic lineage tracing. *Nat Rev Mol Cell Biol* *20*, 753-765.
- 601 Beard, C., Hochedlinger, K., Plath, K., Wutz, A., and Jaenisch, R. (2006). Efficient method to generate  
602 single-copy transgenic mice by site-specific integration in embryonic stem cells. *Genesis* *44*, 23-28.
- 603 Beumer, J., and Clevers, H. (2020). Cell fate specification and differentiation in the adult mammalian  
604 intestine. *Nat Rev Mol Cell Biol*.
- 605 Blackledge, N.P., Farcas, A.M., Kondo, T., King, H.W., McGouran, J.F., Hanssen, L.L.P., Ito, S., Cooper,  
606 S., Kondo, K., Koseki, Y., *et al.* (2014). Variant PRC1 complex-dependent H2A ubiquitylation drives  
607 PRC2 recruitment and polycomb domain formation. *Cell* *157*, 1445-1459.
- 608 Boers, R., Boers, J., de Hoon, B., Kockx, C., Ozgur, Z., Molijn, A., van, I.W., Laven, J., and Gribnau, J.  
609 (2018). Genome-wide DNA methylation profiling using the methylation-dependent restriction  
610 enzyme LpnPI. *Genome Res* *28*, 88-99.
- 611 Bowling, S., Sritharan, D., Osorio, F.G., Nguyen, M., Cheung, P., Rodriguez-Fraticelli, A., Patel, S.,  
612 Yuan, W.C., Fujiwara, Y., Li, B.E., *et al.* (2020). An Engineered CRISPR-Cas9 Mouse Line for  
613 Simultaneous Readout of Lineage Histories and Gene Expression Profiles in Single Cells. *Cell* *181*,  
614 1693-1694.
- 615 Bradner, J.E., Hnisz, D., and Young, R.A. (2017). Transcriptional Addiction in Cancer. *Cell* *168*, 629-  
616 643.
- 617 Calo, E., and Wysocka, J. (2013). Modification of enhancer chromatin: what, how, and why? *Mol Cell*  
618 *49*, 825-837.
- 619 Chen, L., Toke, N.H., Luo, S., Vasoya, R.P., Fullem, R.L., Parthasarathy, A., Perekatt, A.O., and Verzi,  
620 M.P. (2019). A reinforcing HNF4-SMAD4 feed-forward module stabilizes enterocyte identity. *Nat*  
621 *Genet* *51*, 777-785.
- 622 Chiacchiera, F., Rossi, A., Jammula, S., Piunti, A., Scelfo, A., Ordonez-Moran, P., Huelsken, J., Koseki,  
623 H., and Pasini, D. (2016a). Polycomb Complex PRC1 Preserves Intestinal Stem Cell Identity by  
624 Sustaining Wnt/beta-Catenin Transcriptional Activity. *Cell Stem Cell* *18*, 91-103.
- 625 Chiacchiera, F., Rossi, A., Jammula, S., Zanotti, M., and Pasini, D. (2016b). PRC2 preserves intestinal  
626 progenitors and restricts secretory lineage commitment. *EMBO J* *35*, 2301-2314.
- 627 Clark, S.J., Harrison, J., and Frommer, M. (1995). CpNpG methylation in mammalian cells. *Nat Genet*  
628 *10*, 20-27.
- 629 Ferrari, K.J., Amato, S., Noberini, R., Toscani, C., Fernandez-Perez, D., Rossi, A., Conforti, P., Zanotti,  
630 M., Bonaldi, T., Tamburri, S., *et al.* (2021). Intestinal differentiation involves cleavage of histone H3 N-  
631 terminal tails by multiple proteases. *Nucleic Acids Res* *49*, 791-804.
- 632 Frieda, K.L., Linton, J.M., Hormoz, S., Choi, J., Chow, K.K., Singer, Z.S., Budde, M.W., Elowitz, M.B., and  
633 Cai, L. (2017). Synthetic recording and in situ readout of lineage information in single cells. *Nature*  
634 *541*, 107-111.
- 635 Giaimo, B.D., Ferrante, F., Herchenrother, A., Hake, S.B., and Borggreffe, T. (2019). The histone variant  
636 H2A.Z in gene regulation. *Epigenetics Chromatin* *12*, 37.

637 Haber, A.L., Biton, M., Rogel, N., Herbst, R.H., Shekhar, K., Smillie, C., Burgin, G., Delorey, T.M.,  
638 Howitt, M.R., Katz, Y., *et al.* (2017). A single-cell survey of the small intestinal epithelium. *Nature* *551*,  
639 333-339.

640 Herman, J.S., Sagar, and Grun, D. (2018). FateID infers cell fate bias in multipotent progenitors from  
641 single-cell RNA-seq data. *Nat Methods* *15*, 379-386.

642 Ishibashi, F., Shimizu, H., Nakata, T., Fujii, S., Suzuki, K., Kawamoto, A., Anzai, S., Kuno, R., Nagata, S.,  
643 Ito, G., *et al.* (2018). Contribution of ATOH1(+) Cells to the Homeostasis, Repair, and Tumorigenesis  
644 of the Colonic Epithelium. *Stem Cell Reports* *10*, 27-42.

645 Islam, S., Zeisel, A., Joost, S., La Manno, G., Zajac, P., Kasper, M., Lonnerberg, P., and Linnarsson, S.  
646 (2014). Quantitative single-cell RNA-seq with unique molecular identifiers. *Nat Methods* *11*, 163-166.

647 Ito, N., Kii, I., Shimizu, N., Tanaka, H., and Takeda, S. (2017). Direct reprogramming of fibroblasts into  
648 skeletal muscle progenitor cells by transcription factors enriched in undifferentiated subpopulation  
649 of satellite cells. *Sci Rep* *7*, 8097.

650 Kaaij, L.T., van de Wetering, M., Fang, F., Decato, B., Molaro, A., van de Werken, H.J., van Es, J.H.,  
651 Schuijers, J., de Wit, E., de Laat, W., *et al.* (2013). DNA methylation dynamics during intestinal stem  
652 cell differentiation reveals enhancers driving gene expression in the villus. *Genome Biol* *14*, R50.

653 Kazakevych, J., Sayols, S., Messner, B., Krienke, C., and Soshnikova, N. (2017). Dynamic changes in  
654 chromatin states during specification and differentiation of adult intestinal stem cells. *Nucleic Acids*  
655 *Res* *45*, 5770-5784.

656 Kim, T.K., Hemberg, M., Gray, J.M., Costa, A.M., Bear, D.M., Wu, J., Harmin, D.A., Laptewicz, M.,  
657 Barbara-Haley, K., Kuersten, S., *et al.* (2010). Widespread transcription at neuronal activity-regulated  
658 enhancers. *Nature* *465*, 182-187.

659 La Manno, G., Soldatov, R., Zeisel, A., Braun, E., Hochgerner, H., Petukhov, V., Lidschreiber, K.,  
660 Kastriiti, M.E., Lonnerberg, P., Furlan, A., *et al.* (2018). RNA velocity of single cells. *Nature* *560*, 494-  
661 498.

662 Lee, B.K., Shen, W., Lee, J., Rhee, C., Chung, H., Kim, K.Y., Park, I.H., and Kim, J. (2015). Tgif1  
663 Counterbalances the Activity of Core Pluripotency Factors in Mouse Embryonic Stem Cells. *Cell Rep*  
664 *13*, 52-60.

665 Lee, T.I., and Young, R.A. (2013). Transcriptional regulation and its misregulation in disease. *Cell* *152*,  
666 1237-1251.

667 Liu, Y., Maekawa, T., Yoshida, K., Muratani, M., Chatton, B., and Ishii, S. (2019). The Transcription  
668 Factor ATF7 Controls Adipocyte Differentiation and Thermogenic Gene Programming. *iScience* *13*, 98-  
669 112.

670 Lopez-Arribillaga, E., Rodilla, V., Pellegrinet, L., Guiu, J., Iglesias, M., Roman, A.C., Gutarra, S.,  
671 Gonzalez, S., Munoz-Canoves, P., Fernandez-Salguero, P., *et al.* (2015). Bmi1 regulates murine  
672 intestinal stem cell proliferation and self-renewal downstream of Notch. *Development* *142*, 41-50.

673 Neri, F., Rapelli, S., Krepelova, A., Incarnato, D., Parlato, C., Basile, G., Maldotti, M., Anselmi, F., and  
674 Oliviero, S. (2017). Intragenic DNA methylation prevents spurious transcription initiation. *Nature* *543*,  
675 72-77.

676 Ng, A.Y., Waring, P., Risteovski, S., Wang, C., Wilson, T., Pritchard, M., Hertzog, P., and Kola, I. (2002).  
677 Inactivation of the transcription factor Elf3 in mice results in dysmorphogenesis and altered  
678 differentiation of intestinal epithelium. *Gastroenterology* *122*, 1455-1466.

679 Parker, A., Maclaren, O.J., Fletcher, A.G., Muraro, D., Kreuzaler, P.A., Byrne, H.M., Maini, P.K.,  
680 Watson, A.J., and Pin, C. (2017). Cell proliferation within small intestinal crypts is the principal driving  
681 force for cell migration on villi. *FASEB J* *31*, 636-649.

682 Saxena, M., Roman, A.K.S., O'Neill, N.K., Sulahian, R., Jadhav, U., and Shivdasani, R.A. (2017).  
683 Transcription factor-dependent 'anti-repressive' mammalian enhancers exclude H3K27me3 from  
684 extended genomic domains. *Genes Dev* *31*, 2391-2404.

685 Schiebinger, G., Shu, J., Tabaka, M., Cleary, B., Subramanian, V., Solomon, A., Gould, J., Liu, S., Lin, S.,  
686 Berube, P., *et al.* (2019). Optimal-Transport Analysis of Single-Cell Gene Expression Identifies  
687 Developmental Trajectories in Reprogramming. *Cell* *176*, 1517.

688 Schmidt, F., Cherepkova, M.Y., and Platt, R.J. (2018). Transcriptional recording by CRISPR spacer  
689 acquisition from RNA. *Nature* 562, 380-385.

690 Stadhouders, R., Fillion, G.J., and Graf, T. (2019). Transcription factors and 3D genome conformation  
691 in cell-fate decisions. *Nature* 569, 345-354.

692 Tetteh, P.W., Basak, O., Farin, H.F., Wiebrands, K., Kretschmar, K., Begthel, H., van den Born, M.,  
693 Korving, J., de Sauvage, F., van Es, J.H., *et al.* (2016). Replacement of Lost Lgr5-Positive Stem Cells  
694 through Plasticity of Their Enterocyte-Lineage Daughters. *Cell Stem Cell* 18, 203-213.

695 Trapnell, C., Cacchiarelli, D., Grimsby, J., Pokharel, P., Li, S., Morse, M., Lennon, N.J., Livak, K.J.,  
696 Mikkelsen, T.S., and Rinn, J.L. (2014). The dynamics and regulators of cell fate decisions are revealed  
697 by pseudotemporal ordering of single cells. *Nat Biotechnol* 32, 381-386.

698 van Steensel, B., and Henikoff, S. (2000). Identification of in vivo DNA targets of chromatin proteins  
699 using tethered dam methyltransferase. *Nat Biotechnol* 18, 424-428.

700 VanDussen, K.L., Carulli, A.J., Keeley, T.M., Patel, S.R., Puthoff, B.J., Magness, S.T., Tran, I.T., Maillard,  
701 I., Siebel, C., Kolterud, A., *et al.* (2012). Notch signaling modulates proliferation and differentiation of  
702 intestinal crypt base columnar stem cells. *Development* 139, 488-497.

703 Yan, K.S., Gevaert, O., Zheng, G.X.Y., Anchang, B., Probert, C.S., Larkin, K.A., Davies, P.S., Cheng, Z.F.,  
704 Kaddis, J.S., Han, A., *et al.* (2017). Intestinal Enteroendocrine Lineage Cells Possess Homeostatic and  
705 Injury-Inducible Stem Cell Activity. *Cell Stem Cell* 21, 78-90 e76.

706 Yu, S., Tong, K., Zhao, Y., Balasubramanian, I., Yap, G.S., Ferraris, R.P., Bonder, E.M., Verzi, M.P., and  
707 Gao, N. (2018). Paneth Cell Multipotency Induced by Notch Activation following Injury. *Cell Stem Cell*  
708 23, 46-59 e45.

709
